1 Loss of premature stop codon in the *Wall-Associated Kinase 91 (OsWAK91)* gene confers sheath  
2 blight disease resistance in rice

3

4 Authors

5 <sup>1,2</sup>Noor Al-Bader [albader@oregonstate.edu](mailto:albader@oregonstate.edu)

6 <sup>1</sup>Austin Meier [austin.e.meier@gmail.com](mailto:austin.e.meier@gmail.com)

7 <sup>1,2</sup>Matthew Geniza [matthew.geniza@gmail.com](mailto:matthew.geniza@gmail.com)

8 <sup>3</sup>Yamid Sanabria Gongora [yamid.sanabria@gmail.com](mailto:yamid.sanabria@gmail.com)

9 <sup>3</sup>James Oard [joard@agcenter.lsu.edu](mailto:joard@agcenter.lsu.edu)

10 <sup>1</sup>Pankaj Jaiswal [jaiswalp@oregonstate.edu](mailto:jaiswalp@oregonstate.edu)

11

12 <sup>1</sup>Department of Botany and Plant Pathology, Oregon State University, Corvallis, OR, USA

13 <sup>2</sup>Molecular and Cellular Biology Graduate Program, Oregon State University, Corvallis, OR,

14 USA

15 <sup>3</sup>Louisiana State University Agricultural Center, Baton Rouge, LA, USA

16

17 Correspondence:

18 Pankaj Jaiswal, Ph.D.

19 [jaiswalp@science.oregonstate.edu](mailto:jaiswalp@science.oregonstate.edu)

20

21

22

23 **Abstract**

24 The genetic arms race between pathogen and host plant is a tug of war that has been ongoing for  
25 millennia. The “battles” are those of disruption, restoration of signaling and information  
26 transmission on a subcellular level. One such battle occurs between rice an important crop that  
27 feeds 50% of the world population and the sheath blight disease (SB) caused by the fungus  
28 *Rhizoctonia solani*. It results in 10–30% global yield loss annually and can reach 50% under  
29 severe outbreak. Many Receptor-like kinases (RLKs) are recruited as soldiers in these battles.  
30 Wall Associated Receptor Kinases (WAKs) a subfamily of receptor-like kinases have been  
31 shown to play a role in fungal defense. Here we show that rice gene *OsWAK91*, present in the  
32 major SB resistance QTL region on Chromosome 9 is a key component in defense against rice  
33 sheath blight. An SNP mutation C/T separates susceptible variety, Cocodrie (CCDR) from the  
34 resistant line MCR010277 (MCR). The resistant allele C results in the stop codon loss that  
35 results in 68 amino acids longer C-terminus carrying longer protein kinase domain and  
36 phosphorylation sites. Our genotype and phenotype analysis of the top 20 individuals of the  
37 double haploid SB population shows a strong correlation with the SNP. The susceptible allele  
38 appears as a recent introduction found in the japonica subspecies reference genome and a  
39 majority of the tropical and temperate japonica lines sequenced by the 3000 rice genome project.  
40 Multiple US commercial varieties with japonica background carry the susceptible allele and are  
41 known for SB susceptibility. This discovery opens the possibility of introducing resistance  
42 alleles into high yielding commercial varieties to reduce yield losses incurred by the disease.  
43

## 44 **Introduction**

45           The genetic arms race between pathogen and host plant is a tug-of-war that has been  
46 going on for millennia. The “battles” are those of disruption, restoration of signaling and  
47 information transmission on a subcellular level. One such battle occurs between rice, an  
48 important crop that feeds 50% of the global population<sup>1</sup> and the soil-borne pathogen *Rhizoctonia*  
49 *solani* that causes the leaf sheath blight disease (SB). Leaf sheath blight is a major disease in rice  
50 that negatively affects crop yield and quality<sup>2</sup>. Identified by the lesions on the leaf sheath, SB  
51 causes leaves and tillers (secondary shoots) to undergo early senescence, drying out and tissue  
52 death. Ultimately, the significant loss in leaf area due to infection and death affects the plant’s  
53 photosynthetic ability, leading to reductions in biomass and yield. There are no known rice  
54 cultivars fully resistant to leaf sheath blight disease<sup>3-5</sup>. In the United States, planting high-  
55 production rice varieties that are susceptible to SB, resulted in up to 50% yield losses<sup>3</sup>, in a  
56 severe breakout season. As a result, about 72% of the rice planting area in the United States is  
57 sprayed with fungicide that incurs unsustainable economic cost to the farmers<sup>6</sup>. The spraying  
58 may also pose severe ecological constraints on animals and microbiome that co-inhabit and/or  
59 frequently visit rice farms and fresh water bodies. Classified as a soilborne basidiomycete  
60 fungus, *R. solani* is a particularly destructive plant pathogen<sup>7</sup>. In addition to its impact on rice, *R.*  
61 *solani* infects other major crops such as soybean, barley, sorghum, tomato, and maize<sup>8</sup>. Although  
62 *R. solani* rarely produces spores for a mode of mobility, sclerotia are formed which can survive  
63 in the soil for up to two years<sup>9</sup>. Flooding in paddy fields, as common practice or natural  
64 occurrence combined with a highly humid environment, the sclerotia spread and attach to the  
65 plant, causing SB in the susceptible varieties.

66           Currently, disease management for SB relies heavily on fungicides. This approach may  
67 not be the most sustainable due to potential resistance developing in *R. solani* populations, and  
68 pollution of agricultural resources<sup>8</sup>. For example, in 2012, a strain of *R. solani* was isolated in the  
69 state of Louisiana, USA which was resistant to the strobilurin class of fungicides used by rice  
70 farmers<sup>10,11</sup>. A more sustainable approach to disease management is to breed genetic resistance to  
71 SB in commercial varieties. In this study, mRNA sequencing was utilized to compare gene  
72 expression profiles of resistant and susceptible rice plants inoculated with *R. solani*. Using the  
73 transcriptome profiles of two rice lines, susceptible Cocodrie (CCDR)<sup>12</sup>, and resistant  
74 MCR010277 (MCR)<sup>13</sup> (Figure-1A), we examined the response to *R. solani* infection at multiple  
75 time points including Day-0 (untreated control), and Day-1, 3, and 5 after inoculation.

76           The high-quality rice reference genome of *O. sativa japonica* cv Nipponbare (IRGSP  
77 v1.0)<sup>14</sup>, bioinformatics analysis tools and sequences from public databases were used to profile  
78 variety and time point-specific differential expression of all rice genes with special focus on  
79 those overlapping and around the known major SB-resistance QTL on Chromosome 9<sup>15</sup>. We  
80 aligned the transcriptome sequence reads to the reference rice genome to identify variety-  
81 specific synonymous and non-synonymous SNPs, indels and additionally probed their putative  
82 consequences on transcript structure, regulation and protein function *in-silico*. The select set of  
83 SNP markers overlapping the differentially expressed candidate genes from the major SB-  
84 resistance QTL region on chromosome-9 were confirmed by sequencing. The selected markers  
85 were also genotyped in resistant and susceptible individuals derived from a biparental (CCDR  
86 x MCR) doubled haploid (DH) population of 197 individuals.

87           We observed clear gene expression and phenotype differences in response to *R. solani*  
88 infection in each of the two rice parental lines. Our findings also reveal plant defense response

89 genes that are differentially expressed in CCDR and MCR following inoculation and carry  
90 genetic variation that alters the gene function. Based on the gene expression data, genotyping  
91 and phenotyping, we present strong evidence supporting a rice *Wall Associated Kinase 91*  
92 (OsWAK91) gene as a potential breeding target for developing SB resistant breeding lines.

93

## 94 **Results**

### 95 **Transcriptome analysis**

96 Twenty-four cDNA libraries were created, with 3 replicates from 4 time points for each rice line,  
97 Day 0 (untreated control) and Day-1, 3, and 5 after *R. solani* inoculation. Strand-specific 150bp  
98 paired-end sequencing of the cDNA libraries yielded 308,482,684 (CCDR) and 357,018,002  
99 (MCR) reads. After filtering the low-quality raw reads, we obtained 299,687,236 and  
100 346,498,184 (~98.5% of total) from the CCDR and MCR samples respectively, with an average  
101 of 27.7 million reads per sample. The cDNA sequence reads were aligned to the *O. sativa*  
102 *japonica* cv Nipponbare (IRGSP v1.0) reference genome. We found 16,480 (CCDR) and 17,793  
103 (MCR) protein coding genes which show normalized expression from a minimum of one time  
104 point. Expression of known genes from each line, at each time point, was compared in a pairwise  
105 fashion against the untreated, Day-0 sample for differential gene expression analysis. For CCDR  
106 there were 105, 367 and 377 transcripts from 79, 281 and 320 genes at the Day-0 to Day-1, Day-  
107 0 to Day-3, and Day-0 to Day-5 comparisons, respectively. Whereas, in the MCR line, there  
108 were 148 and 597 transcripts from 119 and 443 genes in the Day-0 to Day-3, and Day-0 to Day-5  
109 comparisons, while there were no statistically significant differences in expression observed at  
110 Day 0 to 1 (Figure-1B). In the Day-0 to Day-3 comparison, 17 common genes were up-regulated  
111 in both the CCDR and MCR lines, and one common gene was down-regulated. Similarly, in the

112 Day 0 to 5 comparison, 63 common genes in the CCDR and MCR lines were up-regulated, while  
113 8 genes were down-regulated (Figure 1B). In the susceptible CCDR line, there was a larger  
114 number of differentially-expressed genes at Day-1, and increasing number on Day-3, unlike  
115 the MCR line which has larger number of differentially expressed genes on Day-5 (Figure 1C).

116  
117 Genes up-regulated in the CCDR line include transcription factors, and genes playing a role in  
118 the biotic stress response (both at Day-0 to 1), and enrichment of hydrolase function in the Day-0  
119 to Day-3 comparison. One gene (OS02G0129800) which is grass family-specific, was down-  
120 regulated in both CCDR and MCR lines. This gene is known to be up-regulated in response to  
121 *Burkholderia glumae*<sup>16</sup> the causal agent of rice bacterial panicle blight disease, whereas it is  
122 down-regulated in response to *Xanthomonas oryzae* the causal agent of rice bacterial leaf streak  
123 disease<sup>17</sup>. The Day-0 to Day-5 comparison shows enrichment of genes associated with  
124 catabolism of peptidoglycan, an important cell wall component, those associated with biotic  
125 stimulus and defense responses, kinases and those with chitinase enzyme activity required for  
126 degrading the fungal pathogen cell walls.

127  
128 We found 1948 and 1914 genes from the CCDR and MCR lines, respectively, that undergo  
129 alternative splicing of transcripts. Of these, 1890 genes were common to both lines. Of all the  
130 genes showing alternative splicing under biotic stress, 57 and 20 unique genes were  
131 differentially-expressed in the CCDR and MCR lines, respectively. Intron retention was  
132 identified as the most prevalent form of transcript splicing event in response to *R. solani*  
133 infection (Table-1). This is consistent with known reports from plants, including those under  
134 abiotic stress<sup>18</sup>.

135  
136 Four differentially-expressed candidate genes were identified in the vicinity of the major SB  
137 resistance QTL on chromosome-9; a dormancy auxin-associated family protein  
138 (OS09G0437500), an elicitor-inducible cytochrome P450 (OS09G0441400), a cysteine peptidase  
139 (OS09G0442300) and a *Wall-Associated receptor kinase 91* (*WAK91*; OS09G0561600) with  
140 contrasting expression profiles (Figure 1D). The *WAK91* transcript showed down-regulation up  
141 to Day-3, followed by up-regulation at Day-5 in the MCR line compared to being constitutively  
142 expressed in the CCDR line. OS09G0441400, the elicitor-responsive P450 gene, showed an  
143 expression profile opposite that of *WAK91*. OS09G0437500, the dormancy auxin-associated  
144 gene, exhibited a similar expression profile between the two lines, except at Day-1 in CCDR  
145 when it was down-regulated. In contrast, OS09G0442300, the cysteine peptidase, was highly  
146 expressed in MCR at Day-5.

147

#### 148 **SNP marker discovery and variant prediction**

149 Using the transcriptome sequence reads, we identified 65,121 and 82,293 genetic variants,  
150 including single nucleotide changes (SNPs in the form of transitions and transversions and  
151 insertions and/or deletions (indels) in the susceptible CCDR and the resistant MCR lines,  
152 respectively. A total of 32,401 and 49,573 SNPs were unique to CCDR and MCR, respectively,  
153 and they shared 32,720 SNPs present at the same loci. Of the shared loci, 103 SNP sites  
154 contained alleles different from the reference and between the two lines (Figure 1E). On average,  
155 we observed that the MCR line carries ~2500 transitions (Ts), ~750 transversion (Tv) and ~1000  
156 more indel SNP events compared to the CCDR line (Table-2). In general TvSNPs are have been  
157 shown to have larger regulatory effects compared to the TsSNPs<sup>19</sup>, and rice is known to carry

158 more of the transition types of SNPs<sup>20</sup>. The TsSNPs were greater in number in both lines, but the  
159 transition to transversion ratio (Ts/Tv) in the MCR line was 2.8 compared to 2.68 in CCDR.  
160 Within the TsSNPs, there were almost the same number of A ↔ G, and T ↔ C transitions in  
161 CCDR compared to MCR, whereas there were more G → A and C → T transitions than A → G  
162 and T → C, respectively. The transition type G→C was high in CCDR compared to MCR, where  
163 the opposite type C→G is more abundant. There were significantly fewer TsSNP C→A in MCR  
164 (Table 2).

165  
166 The identified genetic variants map to 22,448 and 24,343 rice reference protein coding genes in  
167 the CCDR and MCR lines respectively, constituting 55% and 66% of the genes in the published  
168 reference genome<sup>14</sup>. Because we used the cDNA sequence reads for SNP calling and genetic  
169 marker development, we used the Variant Effect Predictor (VEP) tool<sup>21</sup> to predict the causal  
170 effect of each SNP on the 5' and 3' UTRs, exons, intron and intron splicing boundaries of the  
171 transcribed gene. If the SNP was in an exon, we also computed the synonymous (sSNP) and non-  
172 synonymous (nsSNP) variations to predict the putative consequences on transcript structure,  
173 regulation, splicing, and peptide structure and function (Table-3).

174  
175 Based on these VEP results, and the differential gene expression results, we developed genetic  
176 markers that co-segregate with the disease resistance phenotype in the population study. The set  
177 of 135 SNP genetic markers<sup>22</sup>, including those identified herein, was short-listed by selecting for  
178 chromosomal locations overlapping the major and minor SB QTL. Sheath blight QTLs were  
179 previously identified on chromosomes 1, 2, 3, 4, 5, 6, 7, 8, 9, 11 and 12<sup>15,23-29</sup>. In the major SB  
180 QTL region, we found that the differentially expressed *OsWAK91* (OS09G0561600) gene carried



181 a non-synonymous SNP (T→C) aligned at position 22,318,449 bp on Chromosome-9 of the  
182 Nipponbare rice reference genome (IRGSP v1.0; Figure 1F). The SB susceptible line CCDR  
183 carried the same allele T as the reference, whereas the resistant MCR line carried the C allele.  
184 The T→C transition results in the loss of a stop codon in MCR WAK91, resulting in a predicted  
185 OsWAK91 peptide with an additional 68 amino acids. Sequencing the amplified region of the  
186 WAK91 SNP marker confirmed for presence of the susceptible T allele in the parent CCDR, as  
187 well as other US elite lines with japonica background, namely, CL53, Cypress, Blue Bonnet, and  
188 CL111, whereas in the indica lines namely, IR29, IR64, Jasmine, TeQing, Pokkali, Nonabokra,  
189 93-11, Kasalath and Nagina22 (N22) were confirmed to carry the resistant allele C (Figure-1G).

190

### 191 **Population study**

192 Evaluation of the 10 most-resistant individuals of the SB2 double haploid (DH ) population  
193 produced disease ratings between 4.7 to 6.0, while the resistant parent MCR showed a 3.5  
194 rating in the same study. In contrast, the 10 most-susceptible individuals of the population  
195 scored between 7.5 to 8.0, while the susceptible parent CCDR was a 7.5 rating (Figure-1A,  
196 1H, 1I, Supplementary Data File 1). The selective genotyping of the parent lines MCR and  
197 CCDR and 20 selected DH lines with 135 nsSNP markers and located in the major and minor  
198 SB QTL regions on chromosomes 1, 2, 3, 4, 5, 6, 8, 9, 11 and 12. These included the non-  
199 synonymous *OsWAK91* SNP (T/C) identified in this study. An ANOVA test was performed,  
200 and the best 13 ranked nsSNP markers, based on the ANOVA analysis, F values, False  
201 Discovery Rates, and adjusted R<sup>2</sup> values (Table 4), mapped to the bottom of chromosome-9,  
202 within the major SB resistance QTL that was identified previously in 12 separate studies using  
203 six *indica* lines (reviewed by Zuo et al. 2014<sup>30</sup>). In the major SB QTL region on chromosome-

204 9, we found that the *OsWAK91* (OS09G0561600) gene carried a nsSNP (T/C) at position  
205 22,318,449 bp on Chromosome-9 of the Nipponbare rice reference genome. Based on the  
206 genotyping data we found that, except in the SB2-99 line, the *WAK91* SNP allele C  
207 contributed by the MCR parent line always co-segregated with SB resistance phenotype,  
208 whereas the allele T from the CCDR parent co-segregates with susceptible phenotype (Figure  
209 1H, Supplementary Data File 1).

210

## 211 **Discussion**

212 In our quest of finding candidate genes in rice that can provide good measure of resistance to  
213 *Rhizoctomia solani* and its application for breeding improved disease resistant rice, our study  
214 integrated transcriptomics, identifying genetic variation and its causes on the gene function.  
215 We identified the rice candidate gene *Wall-Associated Kinase 91* (*OsWAK91*) carrying a T/C  
216 mutation at the stop codon. The *OsWAK91* SNP site at position 22,318,449 bp on  
217 Chromosome-9 of the reference rice genome is part of stop codon (TAG) common to CCDR  
218 and the reference japonica line Nipponbare. Due to the presence of allele C in the resistant line  
219 MCR, the stop codon TAG is lost and replaced by the codon CAG in the *OsWAK91* open  
220 reading frame. The codon CAG codes for glutamine, a polar uncharged side chain amino acid.  
221 The stop codon loss in the MCR line also results in a *OsWAK91* peptide that is 68 amino  
222 acids longer compared to that of CCDR and Nipponbare (Figure 1F). These results lead to two  
223 hypotheses: (1) The *OsWAK91* SNP allele C is associated with SB resistance that is  
224 evolutionarily conserved with *Oryza* ancestors, and (2) the longer *OsWAK91* ORF resulting  
225 from the loss of the stop codon results in a peptide with gain in novel molecular function  
226 which may play a role in leaf sheath blight resistance.

227

228 To test if the association of the *WAK91* SNP allele C with SB resistance is evolutionarily  
229 conserved, we sequenced a PCR-amplified fragment overlapping the *WAK91* SNP loci from  
230 13 additional *O. sativa* lines; five from subspecies *japonica* and eight from subspecies *indica*  
231 (Figure-1G).

232 All US elite rice lines have the *japonica* background, and are known to be SB susceptible<sup>22</sup>.  
233 We predicted, and confirmed that the US *japonica* lines CCDR, CL53, Cypress, Blue Bonnet,  
234 CL111 carry the *OsWAK91* T allele associated with known susceptibility<sup>31,4,32-38</sup>. In contrast,  
235 the *indica* lines (IR29, IR64, Kasalath, Jasmin, TeQing, Nagina 22, Pokkali and Nonabokra)  
236 were confirmed to carry the resistant C allele (Figure-1G), and exhibit some level of known  
237 SB resistance phenotype<sup>35,39-41</sup>. One exception is 93-11, from which the *indica* reference  
238 genome was sequenced<sup>42</sup>, and which is known to be moderately susceptible<sup>39,43</sup>. These results  
239 are consistent with the genotype and phenotype observations of the 20 individuals of the SB2  
240 DH population (with the exception of SB2-99), in which the *OsWAK91* SNP allele C  
241 contributed by the MCR parent always co-segregated with SB resistance phenotype (Figure  
242 1H, 1I, Supplementary Data File 1).

243

244 To gain insights on the origin of the *OsWAK91* SNP in the *Oryza* genus, we used synteny data  
245 provided by the Gramene database<sup>44</sup> to query the *OsWAK91* SNP allele T/C by aligning to the  
246 sequenced genomes of the wild species; *O. longistaminata*, *O. glaberrima*, *O. punctata*, *O.*  
247 *meridionalis*, *O. barthii*, *O. glumaepatula*, *O. rufipogon*, *O. brachyantha* and the outgroup  
248 *Leersia perrieri*. All of these species carry the *indica*-type allele C, and the majority are  
249 known to bear the SB resistance phenotype (Figure-1G)<sup>3,33,45,46</sup>. This suggests that the *indica*-

250 type resistant C allele is of ancestral origin. Conversely, the japonica-type susceptible T allele  
251 is a more recent introduction in the *Oryza* clade, and is restricted to the *O. sativa subspecies*  
252 *japonica* for its origin. We further confirmed its origin by mining the publicly-available  
253 genetic variation data from the 3000 Rice Genome Project<sup>47</sup>. The majority of the temperate  
254 and tropical japonica and aromatic rice lines carry the japonica T allele, whereas the majority  
255 of indica and AUS lines carry the C allele. Only a handful of the lines carry the heterozygous  
256 T/C allele (Figure 1J). We did not have access to the SB resistance phenotype data for these  
257 lines, however, based on our findings, we predict that the indica lines carrying the C allele  
258 may bear some degree of SB resistance.

259

260 The second hypothesis suggests that the *OsWAK91* gene from the SB resistant MCR parent  
261 encodes a peptide predicted to be 68 amino acid longer due to stop loss in the ORF, and this  
262 peptide may have gained a function that plays a role in providing the SB resistance phenotype.  
263 The *OsWAK91* gene is a member of the Wall-Associated receptor Kinase (WAK) gene family  
264 (Figure 1K) and codes for a plasma membrane protein. The OsWAK91 protein contains a  
265 wall-associated receptor kinase galacturonan-binding domain (WAK domain), followed by a  
266 calcium-binding epidermal growth factor (EGF)-like domain in the N-terminal half of the  
267 protein that is present on the extra-cellular side, in the middle is a single transmembrane  
268 domain spanning the plasma membrane, followed by the cytosolic side containing a protein  
269 kinase domain and additional phosphorylation sites for serine, threonine and tyrosine residues,  
270 towards its C-terminal (Figure 1F). The WAK domain is known to be linked to the pectin  
271 fraction of the plant cell wall<sup>48-50</sup>.

272

273 Members of the WAK gene family are known to express and function in response to biotic and  
274 abiotic stress conditions. Expression of *Arabidopsis thaliana* *AtWAK1* is induced by a  
275 pathogen response, by exogenous salicylate or by its analog 2,2-dichloroisonicotinic acid, and  
276 requires the positive regulator NPR1/NIM1. The expression of complete *AtWAK1* or just its  
277 kinase domain alone, can provide resistance to pathogen *Pseudomonas syringae*<sup>51</sup>. Maize  
278 *ZmWAK-RLK* a plasma membrane protein, is known for conferring resistance to northern  
279 corn leaf blight disease caused by the fungal pathogen *Setosphaeria turcica* (anamorph  
280 *Exserohilum turcicum*; previously known as *Helminthosporium turcicum*), by restricting  
281 pathogen entry into the host cells<sup>25</sup>. Similarly wheat WAK gene *Stb6* confers fungal pathogen  
282 resistance without a hypersensitive response<sup>52</sup>. Barley, *HvWAK1* is known to play a role in  
283 root development; however, when compared to other cereals and *Arabidopsis* sequence  
284 divergence in the extracellular domain further verifies the multifunctionality of WAK genes<sup>53</sup>.  
285 The WAKs are known to play role in plant cell expansion during seedling development, MAP  
286 kinase signaling, and to bind to pectin polymers in the plant cell wall and have higher affinity  
287 to bind smaller pectin fibers in response to pathogen attack<sup>48</sup>.

288

289 In the reference rice genome, the WAK gene family members are distributed in 23 subfamilies  
290 (Figure 1K) and are reported to play roles in development<sup>54</sup>, abiotic responses<sup>55,56</sup> and fungal  
291 disease responses<sup>57</sup>. Genes from five WAK subfamilies C, F, L, and Q did not show  
292 expression in our study (Figure 1K). The gene *OsWAK1* (OS01G0136400) is known to  
293 provide resistance to the rice blast disease pathogen *Magnaporthe grisea*, and its expression is  
294 induced by salicylic acid and methyl jasmonate. *OsWAK1* phosphorylates itself and *OsRFP1*,  
295 a putative transcription regulator which binds to the *OsWAK1* kinase domain. The rice

296 *OsWAK91* gene, also known as the *DEFECT IN EARLY EMBRYO SAC1 (OsDEES1)*, and  
297 *OsWAK1* are known for playing role in rice sexual reproduction by regulating the  
298 development of the female gametophyte (the embryo sac), and in anther dehiscence,  
299 respectively<sup>54,58</sup>. Overexpression of *OsWAK25* (OS03G0225700) is known to increase  
300 susceptibility to *R. solani* and *Cochliobolus miyabeanus*, and resistance to *Xanthomonas*  
301 *oryzae* pv. *oryzae* (*Xoo*) and *Magnaporthe oryzae*<sup>59</sup>, whereas its loss of function compromises  
302 Xa21-mediated resistance<sup>60,61</sup>. *OsWAK11* has also been shown to regulates copper  
303 detoxification<sup>55,56</sup>.

304

305 Increased rice blast resistance and reduced fungal hyphae growth was observed when  
306 *OsWAK91* was overexpressed, in contrast to the overexpression of *OsWAK112*  
307 (OS10G0180800), which suppressed resistance. The genes *OsWAK14* (OS02G0632800),  
308 *OsWAK91* and *OsWAK92* (OS09G0562600) are part of the heterotrimeric WAK protein  
309 complex located on the plasma membrane in rice cells<sup>62,63</sup> (Figure 1L). A mutant screening by  
310 Delteil et al.<sup>57</sup> reported that the loss of function of *OsWAK14*, *OsWAK91* and *OsWAK92*  
311 resulted in reduced basal resistance, though it did not affect the growth and fertility<sup>57</sup>. .

312 Conversely, we concluded that both the CCDR and the Nipponbare rice reference lines carry  
313 the susceptible T allele with shorter *OsWAK91* ORF, and are known for SB susceptibility. We  
314 hypothesize that if the *OsWAK91* function is knocked out or when the longer C-terminal is  
315 not present, the line should become increasingly pathogen susceptible. Therefore, we can  
316 expect that the Nipponbare *OsWAK91* knock out line should be highly susceptible. The  
317 results published by Delteil et al.<sup>57</sup> support this hypothesis, through testing with the pathogen  
318 *Magnaporthe grisea*, causal agent of rice blight. In their study, Tos17-transposon knockout

319 mutant plants were generated in the japonica reference Nipponbare rice background  
320 (susceptible). The wildtype Nipponbare and the Tos-17 mutant plants always showed disease  
321 lesions in response to the pathogen, and, as expected, the *OsWAK91* mutant plant showed 2.5  
322 fold increase in lesions.

323

324 The ability to detect and fight pathogenic microbes by the host plants is a complex process.  
325 The pattern-recognition receptors (PRRs) localized on the surface of plant cells are well-  
326 known gene family members of the Receptor-Like Kinase (RLK) proteins that assist in the  
327 recognition of PAMP (Pathogen Associated Molecular Patterns) conserved motifs from  
328 pathogens and DAMPs (Damage Associated Molecular Patterns) derived from the damage by  
329 the microbes development<sup>64,65,63</sup>. Also, in the case of *Magnaporthe grisea* blast disease  
330 response in rice, the chitin elicitor binding protein, OsCEBiP and a chitin elicitor receptor  
331 kinase, OsCERK, are known to form hetero-dimer complex. Upon chitin binding the CEBiP-  
332 CERK receptor complex may in turn induce transphosphorylation followed by activating  
333 downstream signaling<sup>66</sup> (Figure 1L). The majority of the OsCEBiP and OsCERK gene family  
334 members show positive upregulation in the resistant MCR line (Supplementary file 1).  
335 Similarly, the OsWAKs show early transcriptional regulation induced by chitin that is partially  
336 under the control of the chitin receptor CEBiP<sup>57</sup>. Query of the publicly available SNP datasets  
337 <sup>47,67,44</sup> suggests that *OsWAK91* is known to carry ~400 unique SNP and indels present in the 5'  
338 and 3' UTRs, introns, exons, and splice junctions. This includes the stop lost at position  
339 22,318,449 bp identified by us, and indel at 9:22,315,774-22,315,791 bp leading to start lost  
340 and 5'UTR variant, and stops gained at positions 22,316,748 bp, 22,317,724 bp, 22,318,006  
341 bp on chromosome 9 (Supplementary Data File-2). These genetic differences did not show up

342 in our transcriptome-based SNP dataset and are potential genetic markers for further study.  
343 Therefore, based upon the supporting evidence from the genotyping, phenotyping,  
344 evolutionary ancestry of SB tolerance and the favorably segregating SNP in the SB2 DH  
345 population, we propose a working model (Figure 1L) that the candidate gene *OsWAK91*  
346 provides broad tolerance to leaf sheath blight similar to when infected with pathogens *R.*  
347 *solani* and *Magnaporthe grisea*. The longer ORF of the *OsWAK91* in the indica lines, or the  
348 MCR genotype with allele C, *OsWAK91* provides a complete kinase domain and additional  
349 active sites for serine, threonine and tyrosine phosphorylation, which are missing in the  
350 susceptible CCDD genotype, or japonica lines with shorter C-terminus (Figure 1F).  
351 *OsWAK91* forms a heterotrimeric protein complex with *OsWAK14* and *OsWAK92* proteins,  
352 and is an essential member of the WAK protein complex. The shorter kinase domain, and C-  
353 terminus is expected to maintain proper embryo sac development and fertility in both the  
354 japonica and indica lines. The *OsWAK91* in the japonica background with truncated C-  
355 terminus kinase domain is not completely dysfunctional, since, it has been shown to be  
356 involved in embryo sac development and the japonica line Nipponbare and others mentioned  
357 in this work are all fertile. Whereas, the presence of the ancestral allele C contributes to the  
358 stop lost in the candidate gene *OsWAK91*, the longer translated protein kinase domain and  
359 additional phosphorylation sites in the C-terminus in indica lines are necessary for their role in  
360 actively regulating the WAK protein complex function, and downstream signaling to affect the  
361 disease tolerance response.

362

363

364



## 365 **Conclusions**

366 We determined and confirmed strong association of the *OsWAK91* SNP marker to the leaf sheath  
367 blight resistance phenotype by extending the genotyping and phenotyping study to include 10  
368 best resistant and 10 best susceptible individuals from the double haploid population derived  
369 from the CCDR and MCR parents. We also mined the publicly available sequenced genomes  
370 of reference and ancestral *Oryza* species and the 3000 rice genome project to confirm the  
371 evolutionary source of the mutant SNP. The resistant allele and the trait appears ancestral,  
372 whereas the susceptible allele is a more recent acquisition in the *O. sativa japonica* clade. In fact  
373 all the US elite rice varieties have japonica genome integration and are known to carry the  
374 susceptibility trait. A few of them tested by us confirm the presence of the susceptible SNP allele  
375 same as the CCDR line. Our results and inferences, supported by sequencing, genotyping and  
376 phenotyping experiment are well complemented by mutant/knockout screening by earlier  
377 studies. *OsWAK91* knockout mutants make rice disease susceptible. Therefore *OsWAK91*  
378 resistant allele and the genetic marker identified by us is of ancestral origin and is a candidate for  
379 integration in the existing and new cultivated rice varieties for leaf sheath blight resistance,  
380 which may help improve global rice production by rescuing the crop affected by the pathogen  
381 *Rhizoctonia solani*

382

## 383 **Methods**

384

### 385 **Plant material and Inoculation**

386 The sheath blight resistant line MCR010277 and the susceptible variety Cocodrie (CCDR) were  
387 planted in pots placed in a mist chamber in a greenhouse located on the Louisiana State

388 University (LSU) campus in Baton Rouge, LA. Plants were inoculated 50 days after germination  
389 with a Potato Dextrose Agar PDA medium disc (0.8 cm diameter) containing *Rhizoctonia solani*  
390 (strain LR172) mycelia. Discs were placed at the base of the stem and between the leaf blade and  
391 leaf sheath on the main culm of each plant.

392 Temperatures inside the mist chamber ranged from a minimum of 27<sup>0</sup>C at night to a maximum  
393 of 37<sup>0</sup>C in the day. Natural daylight was used, with day length of approximately 11 hours 30  
394 minutes. Humidity was maintained 80-90% using a cool mist humidifier of 1.2 gallons capacity  
395 (Vicks Inc.) that was programmed to function for a two-hour period every six hours. The  
396 chamber frame was constructed with ¾ inch PVC pipe (Charlotte Pipe<sup>®</sup>) covered by extra light  
397 plastic (0.31 mm) (Painter's Plastic – Poly America). The dimensions of the chamber were: 1.32  
398 m wide by 2.70 m length, and 1.42 m in height, (Figure 4.2) for a total capacity of 48 pots per  
399 chamber, each pot containing three plants.

400

401 Leaf samples approximately 2 cm in length were collected from the control untreated (day 0) and  
402 from the inoculation sites 1, 3 and 5 days after treatment, and placed immediately in liquid  
403 nitrogen until transfer to -80<sup>0</sup>C freezer for storage.

404

405 Leaf samples from additional 13 rice lines: CL153, Cypress, Blue Bonnet, CL111 (all japonica),  
406 and 93-11, IR29, IR64, Kasalath, Jasmin, TeQing, Nagina 22 (N22), Pokkali and Nonabokra (all  
407 indica) were collected for DNA extraction, and SNP marker genotyping by DNA amplification  
408 and sequencing.

409

410

411

## 412 **RNA extraction and sequencing**

413 Frozen leaf samples from the CCDR and MCR lines collected at LSU were shipped to Oregon  
414 State University on dry ice and stored at -80°C - until further processing. Poly(A)-enriched  
415 mRNA libraries was prepared from total RNA extracted from the leaf samples using RNA Plant  
416 Reagent<sup>®</sup> (Invitrogen Inc., USA), RNeasy kits (Qiagen Inc., USA) and RNase-free DNase (Life  
417 Technologies Inc., USA). The concentration and quality of the poly(A)-enriched mRNA was  
418 determined using a ND-100 spectrophotometer (Thermo Fisher Scientific Inc., USA) and  
419 Bioanalyzer 2100 (Agilent Technologies Inc., USA), respectively. TruSeq RNA Sample  
420 Preparation kits (Illumina Inc., USA) were used to construct sequencing libraries. An Illumina  
421 HiSeq 3000 (Illumina Inc., USA) at the Center for Genome Research and Biocomputing, Oregon  
422 State University (CGRB, OSU), was used to sequence the 150 bp Paired End cDNA libraries.

423

## 424 **Sequence quality control and read alignments**

425 The program Sickle v1.33 was used to filter all reads based on read quality. Reads under the  
426 phred score 30, and read length under 150bp were rejected. FASTQ files containing quality-  
427 trimmed and filtered reads were generated, yielding MCR and CCDR high-quality reads.  
428 Sequence reads were further filtered by removing any reads showing alignment to the pathogen  
429 *Rhizoctonia solani* AG1-IB isolate (GCA\_000832345.1). Quality-filtered reads were aligned to  
430 the reference *Oryza sativa* japonica cv Nipponbare (IRGSP v1.0) genome and annotation. Reads  
431 from each biological replicate, were aligned with alignment software program STAR v.2.4.1a<sup>68</sup>.  
432 The resulting sequence alignment files were converted to binary alignment files (BAM), sorted  
433 coordinately and indexed using SAMTools v.1.3<sup>69</sup>.

434

### 435 **Differential gene expression (DGE)**

436 The program DESeq2 (v 1.22.2) was used to investigate gene expression levels of the two rice  
437 lines over the time course<sup>70</sup>. A Python package, HTSeq v.0.6.1p1<sup>71</sup>, was used to index the  
438 alignment BAM files and generate raw counts, with a minimum quality-score cut-off of 10. The  
439 DESeq2 R-package was the used to identify differentially expressed genes. First, the raw count  
440 data was transformed using variance stabilizing transformation (vst) method of DESeq2 to filter  
441 outliers. The DESeq2 functions namely, estimate size factors and estimate dispersions, were used  
442 to normalize the aligned read counts. This was followed by the DESeq2 function to fit a negative  
443 binomial general linear model and Wald test statistics to detect the significance scores (p-value).  
444 The final set of differentially expressed transcripts were called at the FDR, Benjamin Hoffman,  
445 corrected cutoff P-value of 0.05. Furthermore, the non-significant events identified by the  
446 DESeq2 software were filtered out. Principle components (PCA) plots were used to visualize  
447 cross-sample comparison in each DE pairwise comparison. MA-plots were generated to visualize  
448 the different between signal intensity between samples in each comparison and dispersion plots  
449 were generated to visualize the fitted normalized counts.

450

### 451 **SNP discovery and variant prediction**

452 Indexed BAM files were analyzed to identify genetic variations including single nucleotide  
453 changes (SNPs; transitions and transversions) and insertions and/or deletions (indels).  
454 Alignments from each variety were pooled using the mpileup function of SAMtools<sup>69</sup>.  
455 VarScan.v2.3.9 (release 80)<sup>72</sup> was used to identify SNPs and indels with four different  
456 minimum read coverage of categories of 2, 6, 8, and 20 and default minimum variant

457 frequency of 0.8 with a p-value of 0.005. A consensus set of SNPs were identified in all four  
458 minimum read coverages. A genotype-specific SNP output data file in VCF format was  
459 generated. The Variant Effect Predictor (VEP) workflow provided by the Gramene database<sup>21</sup>  
460 was used to infer the putative consequences to the structure, splicing, and function of the gene  
461 product (transcript and/or peptide) based on synonymous and/or nonsynonymous (ns) changes.

462

463 In order to develop genetic markers and build a hypothesis, the significant SNPs which  
464 overlapped the major SB-resistance QTL on Chromosome-9 were queried to find association  
465 to the observed differentially-expressed candidate genes. These same SNPs were also queried  
466 against the 3000 Rice Genome data provided by the Rice SNP Seek project<sup>73,74</sup> to profile  
467 allelic nature and distribution in the diverse *O. sativa* lines. Some of the SNPs were also  
468 queried on the Gramene database against the sequenced genomes of wild species of the *Oryza*  
469 genus to infer presence or absence. Finally, peer-reviewed literature was mined to extract, and  
470 confirm information on the known leaf sheath blight resistance phenotype for these rice lines.

471

#### 472 **Scoring alternative splicing events**

473 SpliceGrapher, a Python-based tool<sup>75</sup> was used to score alternative splicing events. This tool  
474 contains splice-site classifier files for each major reference genome, including *Oryza sativa*  
475 *japonica*. These classifiers are used with the first program (sam\_filter.py) in the SpliceGrapher  
476 pipeline that intakes aligned experimental files and the provided classifier and outputs  
477 alignment files filtered by splice site. Next, the filtered alignment files and the reference gene-  
478 annotation file (in the gff file format), is used by the second program (predict\_graphs.py) to  
479 produce a gff file for each gene and its spliced forms. To compare isoforms detected in our

480 samples to the known reference isoforms, we utilized the program  
481 (`gene_model_to_splicegraph.py`) to generate gffs for each known reference gene. The  
482 SpliceGrapher pipeline provided statistics and graphical data files. The types of alternative  
483 splicing events generated using SpliceGrapher are alternative 5' (5'-Alt) and 3' (3'-Alt)  
484 events, exon skipping (ES) and intron retention (IR).

485

#### 486 **Population study**

487 The RiceCAP SB2 mapping population was developed as a genetic resource to identify lines  
488 containing molecular markers associated with SB resistance<sup>76</sup>. The SB2 population consists of  
489 197 doubled-haploid (DH) lines derived from a cross between the susceptible parent Cocodrie  
490 (CCDR)<sup>12</sup> and the resistant parent MCR010277 (MCR)<sup>13</sup>. The population and the two parents  
491 were evaluated for leaf sheath blight disease response on a scale of 0-9, where 0 = no disease  
492 and 9 = dead plant. Plants were grown and phenotyped across three years at Crowley, LA and  
493 Stuttgart, AR, USA<sup>26</sup>. The top 10 SB resistant individuals SB2-03 (GSOR200003), SB2-109  
494 (GSOR200109), SB2-134 (GSOR200134), SB2-158 (GSOR200158), SB2-161  
495 (GSOR200161), SB2-174 (GSOR200174), SB2-206 (GSOR200206), SB2-225  
496 (GSOR200225), SB2-259 (GSOR200206), and SB2-272 (GSOR200272) and the 10 most  
497 susceptible individuals, SB2-13 (GSOR200013), SB2-48 (GSOR200048), SB2-88  
498 (GSOR200088), SB2-99 (GSOR200099), SB2-125 (GSOR200125), SB2-144  
499 (GSOR200144), SB2-203 (GSOR200203), SB2-255 (GSOR200255), SB2-276 (GSOR200276),  
500 and SB2-314 (GSOR200314) from the SB2 DH population along with the two parents were  
501 screened with 135 candidate nsSNP markers (Table 4, Supplementary Data File 3) identified  
502 by Silva et al. 2012<sup>22</sup>, including the *OsWAK9I* SNP. These markers were located in QTL

503 regions on chromosomes 1, 2, 3, 4, 5, 6, 7, 8, 9, 11 and 12<sup>15,23-29</sup>. An ANOVA analysis was  
504 performed to calculate the F values, Bonferroni Hochberg False Discovery Rates (FDR), p  
505 values and adjusted R<sup>2</sup> values.

506

### 507 **DNA extraction, amplification, sequencing and analysis**

508 Total DNA was extracted from seedling tissue using a DNeasy Plant Mini Kit (Qiagen Inc.,  
509 USA). PCR primers were synthesized by Invitrogen Inc., USA for amplification of the region  
510 of interest (Table 5). For PCR amplification, we used Ready PCR Mix, 2x (VWR) following  
511 the recommended protocol on a C100 Thermocycler (BioRad). The thermocycler was set for 3  
512 minutes at 95C for initial denaturation, followed by 40 cycles of 30 seconds at 95C for  
513 denaturation, 30 seconds at 55C for annealing, 30 seconds at 72C for extension, and 5 minutes  
514 at 72C for final extension. Amplified DNA fragments were separated on a 1% agarose gel in  
515 1x TAE buffer. These fragments were extracted from the gel using QIAGEN Gel Extraction  
516 and QIAGEN PCR product cleanup kits. Isolated PCR products were Sanger sequenced at the  
517 CGRB, OSU. The amplified sequences from the PCR products for each experimental line,  
518 including MCR and CCDR, were aligned to the reference Nipponbare genome (IRGSP v1.0)  
519 using ClustalW for confirmation of SNPs and to identify and confirm the alleles.

520

### 521 **Data mining and functional annotation**

522 The reference genome sequences, gene function and gene family annotations were  
523 downloaded in bulk and/or queried online at Gramene database ([www.gramene.org](http://www.gramene.org))<sup>44</sup>. The  
524 3000 rice genome project data was mined at Rice SNP-Seek Database ([http://snp-](http://snp-seek.irri.org/)  
525 [seek.irri.org/](http://snp-seek.irri.org/))<sup>73,74</sup>. Gramene database was queried to pull out all rice genes (IRGSP v1.0)

526 annotated to carry the WAK domain and/or were part of WAK gene family. The protein  
527 sequences of the canonical (longest) isoform) were downloaded in fasta format to run the  
528 CLUSTALW alignment with default parameters. The gene family tree and the differential  
529 gene expression data for the respective rice WAK gene family members were uploaded on the  
530 iTOL web portal<sup>77</sup> to generate the graphics (Figure 1K).

531

532 **Data Availability:** The raw RNA sequence reads were submitted to the EMBL-EBI  
533 ArrayExpress (accession number E-MTAB-6402). The raw sequences from the amplified  
534 fragments from various rice lines were submitted to the European Nucleotide Archive (study  
535 accession PRJEB28811) under the assigned accession numbers ERS2758541-51.

536



537 **References from Zotero (nature style):**

- 538 1. Lau, W. The Challenges of Rice Sustainability: the Increasing World's Population and  
539 Climate Change. *The Challenges of Rice Sustainability: the Increasing World's Population*  
540 *and Climate Change* (2017).
- 541 2. Lee, F. N. Rice Sheath Blight: A Major Rice Disease. *Plant Dis.* **67**, 829 (1983).
- 542 3. Prasad, B. & Eizenga, G. C. Rice Sheath Blight Disease Resistance Identified in *Oryza* spp.  
543 Accessions. *Plant Dis.* **92**, 1503–1509 (2008).
- 544 4. Pan, X. B. *et al.* Major Gene, Nonallelic Sheath Blight Resistance from the Rice Cultivars  
545 Jasmine 85 and Teqing. *Crop Sci.* **39**, 338–346 (1999).
- 546 5. Singh, R., Sunder, S. & Kumar, P. Sheath blight of rice: current status and perspectives.  
547 *Indian Phytopathol.* **69**, 12 (2016).
- 548 6. Nalley, L., Tsiboe, F., Durand-Morat, A., Shew, A. & Thoma, G. Economic and  
549 Environmental Impact of Rice Blast Pathogen (*Magnaporthe oryzae*) Alleviation in the  
550 United States. *PLoS ONE* **11**, (2016).
- 551 7. Zheng, A. *et al.* The evolution and pathogenic mechanisms of the rice sheath blight  
552 pathogen. *Nat. Commun.* **4**, 1424 (2013).
- 553 8. Zhang, C. Q., Liu, Y. H., Ma, X. Y., Feng, Z. & Ma, Z. H. Characterization of sensitivity of  
554 *Rhizoctonia solani*, causing rice sheath blight, to mepronil and boscalid. *Crop Prot.* (2009).
- 555 9. Webster, editor. ), Robert K., Gunnell, editor. ), Pamela S., APS Press, publisher. &  
556 American Phytopathological Society, issuing body. *Compendium of rice diseases*. (St. Paul,  
557 Minn.□: APS Press, 1992).
- 558 10. OLAYA, G. Detection of resistance to QoI fungicides in *Rhizoctonia solani* isolates from  
559 rice. in (2012).

- 560 11. Fungicide-resistant *Rhizoctonia solani* found in Louisiana. *Farm Progress* (2012). Available  
561 at: [https://www.farmprogress.com/rice/fungicide-resistant-rhizoctonia-solani-found-](https://www.farmprogress.com/rice/fungicide-resistant-rhizoctonia-solani-found-louisiana)  
562 [louisiana](https://www.farmprogress.com/rice/fungicide-resistant-rhizoctonia-solani-found-louisiana). (Accessed: 26th March 2019)
- 563 12. Linscombe, S. D. *et al.* Registration of ‘Cocodrie’ Rice. *Crop Sci.* **40**, 294–294 (2000).
- 564 13. Rush, M., Nandakumar, R., Zhang, S. & Groth, D. Status of our research on developing high  
565 levels of partial resistance to sheath blight in lines with high yield potential and good  
566 agronomic characteristics. in (2006).
- 567 14. Kawahara, Y. *et al.* Improvement of the *Oryza sativa* Nipponbare reference genome using  
568 next generation sequence and optical map data. *Rice N. Y. N* **6**, 4 (2013).
- 569 15. Li, Z., Pinson, S. R., Marchetti, M. A., Stansel, J. W. & Park, W. D. Characterization of  
570 quantitative trait loci (QTLs) in cultivated rice contributing to field resistance to sheath  
571 blight (*Rhizoctonia solani*). *TAG Theor. Appl. Genet. Theor. Angew. Genet.* **91**, 382–388  
572 (1995).
- 573 16. Magbanua, Z. V. *et al.* Transcriptomic dissection of the rice – *Burkholderia glumae*  
574 interaction. *BMC Genomics* **15**, 755 (2014).
- 575 17. Wilkins, K. E., Booher, N. J., Wang, L. & Bogdanove, A. J. TAL effectors and activation of  
576 predicted host targets distinguish Asian from African strains of the rice pathogen  
577 *Xanthomonas oryzae* pv. *oryzicola* while strict conservation suggests universal importance  
578 of five TAL effectors. *Front. Plant Sci.* **6**, (2015).
- 579 18. Filichkin, S. A. *et al.* Environmental Stresses Modulate Abundance and Timing of  
580 Alternatively Spliced Circadian Transcripts in *Arabidopsis*. *Mol. Plant* **8**, 207–227 (2015).
- 581 19. Guo, C. *et al.* Transversions have larger regulatory effects than transitions. *BMC Genomics*  
582 **18**, (2017).

- 583 20. Li, G. *et al.* Genome-Wide Sequencing of 41 Rice (*Oryza sativa* L.) Mutated Lines Reveals  
584 Diverse Mutations Induced by Fast-Neutron Irradiation. *Mol. Plant* **9**, 1078–1081 (2016).
- 585 21. Naithani, S., Geniza, M. & Jaiswal, P. Variant Effect Prediction Analysis Using Resources  
586 Available at Gramene Database. *Methods Mol. Biol. Clifton NJ* **1533**, 279–297 (2017).
- 587 22. Silva, J. *et al.* Identification of candidate genes in rice for resistance to sheath blight disease  
588 by whole genome sequencing. *Theor. Appl. Genet.* **124**, 63–74 (2012).
- 589 23. Sato, H. *et al.* Mapping QTLs for Sheath Blight Resistance in the Rice Line WSS2. *Breed.*  
590 *Sci.* **54**, 265–271 (2004).
- 591 24. Pinson, S. R. M., Capdevielle, F. M. & Oard, J. H. Confirming QTLs and Finding Additional  
592 Loci Conditioning Sheath Blight Resistance in Rice Using Recombinant Inbred Lines  
593 Mention of a trademark or proprietary product does not constitute a guarantee or warranty of  
594 the product by the USDA and does not imply its approval to the exclusion of other products  
595 that also can be suitable. *Crop Sci.* **45**, 503–510 (2005).
- 596 25. Zeng, Y., Ji, Z., Ma, L., Li, X. & Yang, C. Advances in Mapping Loci Conferring Resistance  
597 to Rice Sheath Blight and Mining *Rhizoctonia solani* Resistant Resources. *Rice Sci.* **18**, 56–  
598 66 (2011).
- 599 26. Nelson, J. C. *et al.* Sheath-blight resistance QTLs in japonica rice germplasm. *Euphytica*  
600 **184**, 23–34 (2012).
- 601 27. Jia, Y. *et al.* Registration of Four Rice Germplasm Lines with Improved Resistance to Sheath  
602 Blight and Blast Diseases. *J. Plant Regist.* **6**, 95 (2012).
- 603 28. Taguchi-Shiobara, F. *et al.* Mapping and validation of QTLs for rice sheath blight resistance.  
604 *Breed. Sci.* **63**, 301–308 (2013).

- 605 29. Costanzo, S., Jackson, A. K. & Brooks, S. A. High-resolution mapping of Rsn1, a locus  
606 controlling sensitivity of rice to a necrosis-inducing phytotoxin from *Rhizoctonia solani*  
607 AG1-IA. *Theor. Appl. Genet.* **123**, 33–41 (2011).
- 608 30. Zuo, S. *et al.* Fine-mapping of qSB-9TQ, a gene conferring major quantitative resistance to  
609 rice sheath blight. *Mol. Breed.* **34**, 2191–2203 (2014).
- 610 31. Masajo, T. M. Varietal Resistance in Rice to Sheath Blight Caused by *Thanatephorus*  
611 *Cucumeris* (Frank) Donk (*Rhizoctonia Solani* Kuhn). 169
- 612 32. Wamishe, Y., Cartwright, R. & Lee, F. Management of Rice Diseases. in *Compendium of*  
613 *Rice Diseases and Pests* 16
- 614 33. Eizenga, G. C., Lee, F. N. & Rutger, J. N. Screening *Oryza* Species Plants for Rice Sheath  
615 Blight Resistance. *Plant Dis.* **86**, 808–812 (2002).
- 616 34. Groth, D. E. & Bond, J. A. Effects of Cultivars and Fungicides on Rice Sheath Blight, Yield,  
617 and Quality. *Plant Dis.* **91**, 1647–1650 (2007).
- 618 35. Jia, Y. *et al.* Rapid Determination of Rice Cultivar Responses to the Sheath Blight Pathogen  
619 *Rhizoctonia solani* Using a Micro-Chamber Screening Method. *Plant Dis.* **91**, 485–489  
620 (2007).
- 621 36. Srinivasachary, Willocquet, L. & Savary, S. Resistance to rice sheath blight (*Rhizoctonia*  
622 *solani* Kühn) [(teleomorph: *Thanatephorus cucumeris* (A.B. Frank) Donk.)] disease: current  
623 status and perspectives. *Euphytica* **178**, 1–22 (2011).
- 624 37. XiaoXing, L., Ping, L. & AiPing, Z. In vitro selection of sheath blight resistance germplasm  
625 in rice. *Afr. J. Microbiol. Res.* **7**, 4422–4429 (2013).
- 626 38. The International Rice Genebank Collection Information System. Available at:  
627 <http://irgcis.irri.org:81/grc/SearchData.htm>. (Accessed: 29th March 2019)

- 628 39. Zuo, S. *et al.* Prospect of the QTL-qSB-9Tq utilized in molecular breeding program of  
629 japonica rice against sheath blight. *J. Genet. Genomics* **35**, 499–505 (2008).
- 630 40. Hossain, M. K. *et al.* Identification and validation of sheath blight resistance in rice (*Oryza*  
631 *sativa* L.) cultivars against *Rhizoctonia solani*. *Can. J. Plant Pathol.* **36**, 482–490 (2014).
- 632 41. Chaudhary, B. Evaluating Sheath Blight Resistance in Rice Using Detached Tiller and Field  
633 Screening Method. *J. Nepal Agric. Res. Counc.* **1**, (2015).
- 634 42. Yu, J. *et al.* A draft sequence of the rice genome (*Oryza sativa* L. ssp. *indica*). *Science* **296**,  
635 79–92 (2002).
- 636 43. Xia, Y. *et al.* Transcriptome analysis reveals the host selection fitness mechanisms of the  
637 *Rhizoctonia solani* AG11A pathogen. *Sci. Rep.* **7**, 10120 (2017).
- 638 44. Tello-Ruiz, M. K. *et al.* Gramene 2018: unifying comparative genomics and pathway  
639 resources for plant research. *Nucleic Acids Res.* **46**, D1181–D1189 (2018).
- 640 45. Ram, T. *et al.* Identification of donors for sheath blight resistance in wild species of rice.  
641 *Indian J. Genet. Plant Breed. India* (2008).
- 642 46. Djedatin, G. *et al.* Evaluation of African Cultivated Rice *Oryza glaberrima* for Resistance to  
643 Bacterial Blight. *Plant Dis.* **95**, 441–447 (2011).
- 644 47. Li, J.-Y., Wang, J. & Zeigler, R. S. The 3,000 rice genomes project: new opportunities and  
645 challenges for future rice research. *GigaScience* **3**, 8 (2014).
- 646 48. Kohorn, B. D. & Kohorn, S. L. The cell wall-associated kinases, WAKs, as pectin receptors.  
647 *Front. Plant Sci.* **3**, (2012).
- 648 49. Anderson, C. M. *et al.* WAKs: cell wall-associated kinases linking the cytoplasm to the  
649 extracellular matrix. *Plant Mol. Biol.* **47**, 197–206 (2001).

- 650 50. Wagner, T. A. & Kohorn, B. D. Wall-Associated Kinases Are Expressed throughout Plant  
651 Development and Are Required for Cell Expansion. *Plant Cell* **13**, 303–318 (2001).
- 652 51. He, P. *et al.* Overexpression of Pti5 in Tomato Potentiates Pathogen-Induced Defense Gene  
653 Expression and Enhances Disease Resistance to *Pseudomonas syringae* pv. tomato. *Mol.*  
654 *Plant. Microbe Interact.* **14**, 1453–1457 (2001).
- 655 52. Saintenac, C. *et al.* Wheat receptor-kinase-like protein Stb6 controls gene-for-gene resistance  
656 to fungal pathogen *Zymoseptoria tritici*. *Nat. Genet.* **50**, 368 (2018).
- 657 53. Kaur, R., Singh, K. & Singh, J. A root-specific wall-associated kinase gene, HvWAK1,  
658 regulates root growth and is highly divergent in barley and other cereals. *Funct. Integr.*  
659 *Genomics* **13**, 167–177 (2013).
- 660 54. Kanneganti, V. & Gupta, A. K. Wall associated kinases from plants — an overview. *Physiol.*  
661 *Mol. Biol. Plants Int. J. Funct. Plant Biol.* **14**, 109–118 (2008).
- 662 55. Hu, W. *et al.* Cloning and characterization of the *Oryza sativa* wall-associated kinase gene  
663 OsWAK11 and its transcriptional response to abiotic stresses. *Plant Soil* **384**, 335–346  
664 (2014).
- 665 56. Xia, Y. *et al.* OsWAK11, a rice wall-associated kinase, regulates Cu detoxification by  
666 alteration the immobilization of Cu in cell walls. *Environ. Exp. Bot.* **150**, 99–105 (2018).
- 667 57. Delteil, A. *et al.* Several wall-associated kinases participate positively and negatively in basal  
668 defense against rice blast fungus. *BMC Plant Biol.* **16**, 17 (2016).
- 669 58. Wang, N. *et al.* The Rice Wall-Associated Receptor-Like Kinase Gene OsDEES1 Plays a  
670 Role in Female Gametophyte Development. *Plant Physiol.* **160**, 696–707 (2012).
- 671 59. Harkenrider, M. *et al.* Overexpression of Rice Wall-Associated Kinase 25 (OsWAK25)  
672 Alters Resistance to Bacterial and Fungal Pathogens. *PLOS ONE* **11**, e0147310 (2016).

- 673 60. Seo, Y.-S. *et al.* Towards Establishment of a Rice Stress Response Interactome. *PLOS Genet.*  
674 7, e1002020 (2011).
- 675 61. Ke, Y., Deng, H. & Wang, S. Advances in understanding broad-spectrum resistance to  
676 pathogens in rice. *Plant J.* **90**, 738–748 (2017).
- 677 62. Li, L., Yu, Y., Zhou, Z. & Zhou, J.-M. Plant pattern-recognition receptors controlling innate  
678 immunity. *Sci. China Life Sci.* **59**, 878–888 (2016).
- 679 63. Cayrol, B., Delteil, A., Gobbato, E., Kroj, T. & Morel, J.-B. Three wall-associated kinases  
680 required for rice basal immunity form protein complexes in the plasma membrane. *Plant*  
681 *Signal. Behav.* **11**, e1149676 (2016).
- 682 64. Boller, T. & Felix, G. A renaissance of elicitors: perception of microbe-associated molecular  
683 patterns and danger signals by pattern-recognition receptors. *Annu. Rev. Plant Biol.* **60**, 379–  
684 406 (2009).
- 685 65. Macho, A. P. & Zipfel, C. Plant PRRs and the activation of innate immune signaling. *Mol.*  
686 *Cell* **54**, 263–272 (2014).
- 687 66. Hayafune, M. *et al.* Chitin-induced activation of immune signaling by the rice receptor  
688 CEBiP relies on a unique sandwich-type dimerization. *Proc. Natl. Acad. Sci.* **111**, E404–  
689 E413 (2014).
- 690 67. Duitama, J. *et al.* Whole Genome Sequencing of Elite Rice Cultivars as a Comprehensive  
691 Information Resource for Marker Assisted Selection. *PLOS ONE* **10**, e0124617 (2015).
- 692 68. Dobin, A. *et al.* STAR: ultrafast universal RNA-seq aligner. *Bioinforma. Oxf. Engl.* **29**, 15–  
693 21 (2013).
- 694 69. Li, H. *et al.* The Sequence Alignment/Map format and SAMtools. *Bioinformatics* **25**, 2078–  
695 2079 (2009).

- 696 70. Love, M. I., Huber, W. & Anders, S. Moderated estimation of fold change and dispersion for  
697 RNA-seq data with DESeq2. *Genome Biol.* **15**, 550 (2014).
- 698 71. Anders, S., Pyl, P. T. & Huber, W. HTSeq—a Python framework to work with high-  
699 throughput sequencing data. *Bioinformatics* **31**, 166–169 (2015).
- 700 72. Koboldt, D. C. *et al.* VarScan 2: somatic mutation and copy number alteration discovery in  
701 cancer by exome sequencing. *Genome Res.* **22**, 568–576 (2012).
- 702 73. Mansueto, L. *et al.* Rice SNP-seek database update: new SNPs, indels, and queries. *Nucleic*  
703 *Acids Res.* **45**, D1075–D1081 (2017).
- 704 74. Wang, W. *et al.* Genomic variation in 3,010 diverse accessions of Asian cultivated rice.  
705 *Nature* **557**, 43 (2018).
- 706 75. Rogers, M. F., Thomas, J., Reddy, A. S. & Ben-Hur, A. SpliceGrapher: detecting patterns of  
707 alternative splicing from RNA-Seq data in the context of gene models and EST data.  
708 *Genome Biol.* **13**, R4 (2012).
- 709 76. Chu, Q. *et al.* Registration of a C/M doubled haploid mapping population of rice. **46**, 1417  
710 (2006).
- 711 77. Letunic, I. & Bork, P. Interactive tree of life (iTOL) v3: an online tool for the display and  
712 annotation of phylogenetic and other trees. *Nucleic Acids Res.* **44**, W242–W245 (2016).
- 713
- 714



715 **Acknowledgments**

716 We would like to thank Center for Genome Research and Biocomputing (CGRB) core facility  
717 staff, Mark Dasenko for Illumina cluster generation and sequencing, Matthew Peterson, Chris  
718 Sullivan and Justin Elser for computational support and Dr. Laurel Cooper and Justin Preece  
719 for English language editing. Funding for the project was supported by NSF awards (IOS-  
720 1127112 and IOS- 1340112) and the [Louisiana Rice Research Board](#).

721

722 **Author Contributions**

723 PJ and JO conceived and designed the experiments. YSG, MG, NAB and AM performed the  
724 experiments. NAB, MG, AM, YSG, PJ, JO analyzed the data. Everyone wrote the paper:

725

726 **Competing Interest**

727 The Authors declare no competing interests.

728

729

730 **Figure Legend:**

731

732 **Figure-1:**

733

734 (A) The rice leaf sheath blight disease response shown by the resistant parent MCR010277

735 (MCR), the susceptible parent Cocodrie (CCDR) and the SB2-174 individual of the SB2

736 double haploid population. The disease response was tested by infecting the plants with the

737 fungal pathogen *Rhizoctonia solani* (strain LR172).

738 (B) The number of differentially expressed genes between the two parent lines when

739 compared to the Day-0 vs Day-1, Day-3 and Day-5 after infection.

740 (C) Number of up and down regulated genes shared between the time points within each rice

741 line.

742 (D) The differential expression of four candidate genes overlapping the major leaf sheath

743 resistance QTL on Chromosome 9 of rice. Rows are each of the four candidate genes and

744 columns are (L-R) first three, MCR Day-0 vs Day-1, Day-0 vs Day-3, Day-0 vs Day-5 and last

745 three, CCDR Day-0 vs Day-1, Day-0 vs Day-3, and Day-0 vs Day-5

746 (E) Number of unique and shared SNPs and indels identified in the CCDR and the MCR lines.

747 (F) The OsWAK91 ORF showing the regions of the coded domains (top) and zoom-in view of

748 the CDS and the ORF from the reference Nipponbare, and parents CCDR and MCR rice lines

749 (bottom). The presence of allele C in the leaf sheath blight resistant MCR line results in stop

750 codon loss and 82 amino acid longer WAK91 peptide which carries a longer protein kinase

751 domain(cyan colored) and additional predicted sites for serine (S), threonine (T) and tyrosine

752 (Y) phosphorylation sites (green colored).

753 (G) Genotyping and Phenotyping of the top ten resistant and ten susceptible individuals of the  
754 SB2 double haploid population. The population and the two parents were evaluated for sheath  
755 blight response phenotype on a scale of 0-9, where 0 = no disease and 9 = dead plant. The  
756 OsWAK91 SNP alleles T/C were scored for presence/absence.

757 (H) OsWAK91 SNP allele T/C in 13 rice lines was confirmed by sequencing the SNP.  
758 Synteny-based sequence data was mined at the publicly available Gramene database for the  
759 reference lines indica 93-11, japonica Nipponbare, the wild species of *Oryza* genus and its  
760 outgroup *Leersia Perrieri*. The leaf sheath blight disease response phenotypes were mined  
761 from the previously published literature.

762 (I) The leaf sheath blight response phenotype of the individuals SB2-276 (susceptible) and  
763 SB2-03 (resistant) from the DH population.

764 (J) Occurrence of the OsWAK91 SNP allele T/C The genotyping for in the genomes of the  
765 3000 rice lines and their grouping

766 (K) Phylogenetic tree of the rice Wall associated Kinase gene family members distributed in  
767 23 Subfamilies. Differential gene expression data from the MSC and CCDR rice lines were  
768 plotted in the track order (outside to inside) MCR Day-0 Vs Day-1, Day-3, Day-5 and CCDR  
769 Day-0 Vs Day-1, Day-3 and Day-5.

770 (K) A model of the host-pathogen interaction showing response to fungal chitin binding by the  
771 chitin binding receptor complex, and potential interactions and functions by the heterotrimeric  
772 WAK receptor protein complex. The WAK complex is functional in both the MCR and the  
773 CCDR rice lines, however the MCR OsWAK91 C-terminus carrying the longer protein kinase  
774 domain and the additional serine, threonine and tyrosine phosphorylation sites is expected to

775 play a role in successfully initiating the downstream signaling response to provide leaf sheath

776 blight resistance.

777

778

779 **Tables:**

780

781

782 Table-1

783 Summary of the number of genes and events undergoing alternative splicing of transcripts in the  
784 susceptible CCDR and resistant MCR rice lines at different time points.

785

786

| Rice line             | MCR   |        |       |        |       |        |       |        |
|-----------------------|-------|--------|-------|--------|-------|--------|-------|--------|
| Time points           | Day-0 |        | Day-1 |        | Day-3 |        | Day-5 |        |
| Splicing type         | Genes | Events | Genes | Events | Genes | Events | Genes | Events |
| Alt 5' UTR            | 335   | 392    | 339   | 396    | 335   | 392    | 335   | 392    |
| Alt 3' UTR            | 553   | 652    | 553   | 652    | 551   | 650    | 551   | 650    |
| Exon Skipping (ES)    | 189   | 204    | 191   | 207    | 185   | 200    | 185   | 200    |
| Intron retention (IR) | 1,357 | 1,651  | 1,357 | 1,651  | 1,350 | 1,644  | 1,351 | 1645   |
| Rice line             | CCDR  |        |       |        |       |        |       |        |
| Time points           | Day-0 |        | Day-1 |        | Day-3 |        | Day-5 |        |
| Splicing type         | Genes | Events | Genes | Events | Genes | Events | Genes | Events |
| Alt 5' UTR            | 337   | 394    | 336   | 393    | 335   | 392    | 336   | 393    |
| Alt 3' UTR            | 557   | 656    | 553   | 652    | 551   | 650    | 553   | 652    |
| Exon Skipping (ES)    | 186   | 201    | 189   | 204    | 187   | 202    | 185   | 200    |
| Intron retention (IR) | 1,371 | 1,666  | 1,369 | 1,664  | 1,355 | 1,649  | 1,357 | 1,651  |

787

788

789

790 **Table 2**

791 Counts of SNPs and indels identified in the susceptible CCDR and the resistant MCR rice lines,  
792 by aligning the RNA-Seq sequence reads against the reference *O. sativa japonica* cv Nipponbare  
793 reference genome (IRGSP v1.0).

794

| SNP            | Substitution Type | CCDR   | MCR    |
|----------------|-------------------|--------|--------|
| A → G          | Transition        | 8,703  | 11,102 |
| T → C          | Transition        | 8,896  | 11,228 |
| G → A          | Transition        | 8,735  | 11,420 |
| C → T          | Transition        | 8,878  | 11,622 |
| G → C          | Transversion      | 2,817  | 3,523  |
| C → G          | Transversion      | 2,730  | 3,559  |
| T → G          | Transversion      | 3,274  | 4,108  |
| G → T          | Transversion      | 3,367  | 4,158  |
| A → C          | Transversion      | 3,316  | 3,964  |
| C → A          | Transversion      | 3,339  | 4,175  |
| T → A          | Transversion      | 3,734  | 4,428  |
| A → T          | Transversion      | 3,685  | 4,397  |
| Total SNPs     |                   | 61,474 | 77,684 |
| Total Indels   |                   | 3,647  | 4,609  |
| Total variants |                   | 65,121 | 82,293 |

795

796

797 **Table-3**

798 Summary of SNP consequences on gene function and structure based on its overlapping position  
799 in the genes identified in the reference *O. sativa japonica* cv Nipponbare reference genome  
800 (IRGSP v1.0).

801

| <b>SNP Consequence</b>             | <b>CCDR</b> | <b>MCR</b> |
|------------------------------------|-------------|------------|
| splice donor variant               | 3,207       | 3,457      |
| splice acceptor variant            | 1,952       | 2,167      |
| stop gained                        | 256         | 325        |
| stop lost                          | 96          | 124        |
| start lost                         | 26          | 47         |
| missense variant                   | 12,951      | 18,211     |
| splice region variant              | 8,527       | 9,494      |
| synonymous variant                 | 12,849      | 17,534     |
| stop retained variant              | 29          | 33         |
| coding sequence variant            | 10          | 8          |
| 5 prime UTR variant                | 4,222       | 6,031      |
| 3 prime UTR variant                | 17,605      | 20,730     |
| non coding transcript exon variant | 2,389       | 2,694      |
| intron variant                     | 19,605      | 23,266     |
| non coding transcript variant      | 2,854       | 3,311      |
| upstream gene variant              | 99,220      | 124,576    |
| downstream gene variant            | 110,185     | 138,011    |
| intergenic variant                 | 887         | 1,103      |

802

803

804 **Table: 4**

805 Results of the ANOVA analysis. Includes Marker rank, MSU (v7) and IRGSP v1.0 rice gene  
 806 IDs, F value, Bonferroni Hochberg False Discovery Rate (FDR), p values and R-squared values  
 807 of 135 nsSNP makers genotyped in the 10 most resistant and 10 most susceptible lines of the  
 808 RiceCAP project's SB2 double haploid mapping population.  
 809

| Rank | MSU gene ID    | IRGSP gene ID | F value   | Raw p value | p value | FDR     | R <sup>2</sup> value |
|------|----------------|---------------|-----------|-------------|---------|---------|----------------------|
| 1    | LOC_Os09g32860 | N/A           | 149.15400 | 0.00000     | 0.00000 | 0.00000 | 0.89232              |
| 2    | LOC_Os09g33710 | Os09g0511900  | 61.04000  | 0.00000     | 0.00004 | 0.00000 | 0.77227              |
| 3    | LOC_Os09g34180 | Os09g0517600  | 61.04000  | 0.00000     | 0.00004 | 0.00000 | 0.77227              |
| 4    | LOC_Os09g36900 | Os09g0540600  | 61.04000  | 0.00000     | 0.00004 | 0.00000 | 0.77227              |
| 5    | LOC_Os09g37230 | Os09g0544300  | 61.04000  | 0.00000     | 0.00004 | 0.00000 | 0.77227              |
| 6    | LOC_Os09g37240 | Os09g0544400  | 61.04000  | 0.00000     | 0.00004 | 0.00000 | 0.77227              |
| 7    | LOC_Os09g37590 | N/A           | 61.04000  | 0.00000     | 0.00004 | 0.00000 | 0.77227              |
| 8    | LOC_Os09g37800 | Os09g0550600  | 61.04000  | 0.00000     | 0.00004 | 0.00000 | 0.77227              |
| 9    | LOC_Os09g37880 | Os09g0551400  | 61.04000  | 0.00000     | 0.00004 | 0.00000 | 0.77227              |
| 10   | LOC_Os09g38700 | Os09g0559900  | 61.04000  | 0.00000     | 0.00004 | 0.00000 | 0.77227              |
| 11   | LOC_Os09g38710 | Os09g0560000  | 61.04000  | 0.00000     | 0.00004 | 0.00000 | 0.77227              |
| 12   | LOC_Os09g38850 | Os09g0561600  | 61.04000  | 0.00000     | 0.00004 | 0.00000 | 0.77227              |
| 13   | LOC_Os09g38970 | Os09g0563250  | 61.04000  | 0.00000     | 0.00004 | 0.00000 | 0.77227              |
| 14   | LOC_Os12g10330 | Os12g0204600  | 41.63300  | 0.00000     | 0.00052 | 0.00004 | 0.69815              |
| 15   | LOC_Os12g10410 | Os12g0205500  | 41.63300  | 0.00000     | 0.00052 | 0.00004 | 0.69815              |
| 16   | LOC_Os12g13100 | Os12g0233100  | 41.63300  | 0.00000     | 0.00052 | 0.00004 | 0.69815              |
| 17   | LOC_Os12g15460 | Os12g0256900  | 41.63300  | 0.00000     | 0.00052 | 0.00004 | 0.69815              |
| 18   | LOC_Os09g39620 | Os09g0569800  | 37.14500  | 0.00001     | 0.00106 | 0.00008 | 0.67359              |
| 19   | LOC_Os12g09710 | Os12g0198900  | 33.11300  | 0.00002     | 0.00211 | 0.00016 | 0.56581              |
| 20   | LOC_Os12g10180 | N/A           | 33.11300  | 0.00002     | 0.00211 | 0.00016 | 0.56581              |
| 21   | LOC_Os09g32020 | Os09g0493500  | 23.45700  | 0.00013     | 0.01449 | 0.00097 | 0.48368              |
| 22   | LOC_Os12g06980 | Os12g0167700  | 23.45700  | 0.00013     | 0.01449 | 0.00097 | 0.48359              |
| 23   | LOC_Os12g09000 | Os12g0192500  | 16.85600  | 0.00066     | 0.07303 | 0.00468 | 0.44991              |
| 24   | LOC_Os12g07950 | Os12g0179800  | 14.72200  | 0.00121     | 0.13166 | 0.00807 | 0.35200              |
| 25   | LOC_Os06g13040 | Os06g0237400  | 9.77800   | 0.00583     | 0.62916 | 0.03699 | 0.33220              |
| 26   | LOC_Os06g15170 | Os06g0262800  | 8.95400   | 0.00781     | 0.83613 | 0.04726 | 0.28421              |
| 27   | LOC_Os12g03554 | Os12g0129550  | 7.14700   | 0.01550     | 0.98350 | 0.08949 | 0.26383              |
| 28   | LOC_Os12g04660 | Os12g0140700  | 7.14700   | 0.01550     | 0.98350 | 0.08949 | 0.26383              |
| 29   | LOC_Os02g34490 | Os02g0549900  | 6.28300   | 0.02201     | 0.98350 | 0.10351 | 0.25873              |
| 30   | LOC_Os02g34850 | Os02g0554000  | 6.28300   | 0.02201     | 0.98350 | 0.10351 | 0.25873              |
| 31   | LOC_Os02g35210 | Os02g0558400  | 6.28300   | 0.02201     | 0.98350 | 0.10351 | 0.25873              |



|    |                |              |         |         |         |         |         |
|----|----------------|--------------|---------|---------|---------|---------|---------|
| 32 | LOC_Os12g07800 | Os12g0177800 | 6.45100 | 0.02053 | 0.98350 | 0.10351 | 0.25598 |
| 33 | LOC_Os12g06740 | Os12g0164300 | 6.45100 | 0.02053 | 0.98350 | 0.10351 | 0.24260 |
| 34 | LOC_Os08g19694 | Os08g0293300 | 6.19300 | 0.02284 | 0.98350 | 0.10361 | 0.24120 |
| 35 | LOC_Os08g20020 | Os08g0296900 | 5.72100 | 0.02788 | 0.98350 | 0.11423 | 0.24120 |
| 36 | LOC_Os08g30850 | Os08g0399300 | 5.72100 | 0.02788 | 0.98350 | 0.11423 | 0.18705 |
| 37 | LOC_Os08g30910 | Os08g0400200 | 5.76500 | 0.02736 | 0.98350 | 0.11423 | 0.18705 |
| 38 | LOC_Os06g19110 | Os06g0295000 | 3.85200 | 0.06535 | 0.98350 | 0.20748 | 0.17626 |
| 39 | LOC_Os06g22020 | Os06g0325900 | 3.85200 | 0.06535 | 0.98350 | 0.20748 | 0.17626 |
| 40 | LOC_Os06g22460 | Os06g0330100 | 3.85200 | 0.06535 | 0.98350 | 0.20748 | 0.17626 |
| 41 | LOC_Os06g23530 | Os06g0343100 | 3.85200 | 0.06535 | 0.98350 | 0.20748 | 0.17626 |
| 42 | LOC_Os06g28124 | Os06g0475400 | 3.85200 | 0.06535 | 0.98350 | 0.20748 | 0.17626 |
| 43 | LOC_Os06g28670 | Os06g0481400 | 3.85200 | 0.06535 | 0.98350 | 0.20748 | 0.17626 |
| 44 | LOC_Os06g29700 | Os06g0492800 | 3.85200 | 0.06535 | 0.98350 | 0.20748 | 0.17626 |
| 45 | LOC_Os06g29844 | Os06g0494400 | 4.14200 | 0.05684 | 0.98350 | 0.20748 | 0.17626 |
| 46 | LOC_Os03g43684 | N/A          | 4.14200 | 0.05684 | 0.98350 | 0.20748 | 0.16570 |
| 47 | LOC_Os06g31070 | Os06g0507200 | 3.57500 | 0.07486 | 0.98350 | 0.23189 | 0.12005 |
| 48 | LOC_Os06g32350 | N/A          | 2.20400 | 0.15499 | 0.98350 | 0.33529 | 0.12005 |
| 49 | LOC_Os04g10460 | Os04g0183500 | 2.20400 | 0.15499 | 0.98350 | 0.33529 | 0.11751 |
| 50 | LOC_Os04g11640 | Os04g0193200 | 2.20400 | 0.15499 | 0.98350 | 0.33529 | 0.11751 |
| 51 | LOC_Os04g11970 | Os04g0196200 | 2.20400 | 0.15499 | 0.98350 | 0.33529 | 0.11751 |
| 52 | LOC_Os04g15650 | Os04g0227000 | 2.39700 | 0.13899 | 0.98350 | 0.33529 | 0.11751 |
| 53 | LOC_Os04g20680 | Os04g0275100 | 2.39700 | 0.13899 | 0.98350 | 0.33529 | 0.11751 |
| 54 | LOC_Os04g21890 | N/A          | 2.39700 | 0.13899 | 0.98350 | 0.33529 | 0.11751 |
| 55 | LOC_Os04g23620 | N/A          | 2.39700 | 0.13899 | 0.98350 | 0.33529 | 0.11751 |
| 56 | LOC_Os04g23890 | Os04g0304200 | 2.39700 | 0.13899 | 0.98350 | 0.33529 | 0.11751 |
| 57 | LOC_Os09g16540 | Os09g0334800 | 2.39700 | 0.13899 | 0.98350 | 0.33529 | 0.10953 |
| 58 | LOC_Os09g17600 | Os09g0344800 | 2.39700 | 0.13899 | 0.98350 | 0.33529 | 0.10953 |
| 59 | LOC_Os09g17630 | Os09g0345300 | 2.39700 | 0.13899 | 0.98350 | 0.33529 | 0.10953 |
| 60 | LOC_Os03g30130 | Os03g0415200 | 2.45600 | 0.13451 | 0.98350 | 0.33529 | 0.10907 |
| 61 | LOC_Os03g37720 | Os03g0573500 | 2.45600 | 0.13451 | 0.98350 | 0.33529 | 0.10907 |
| 62 | LOC_Os03g39150 | Os03g0588400 | 2.16600 | 0.15840 | 0.98350 | 0.33529 | 0.10907 |
| 63 | LOC_Os03g40250 | Os03g0599400 | 2.16600 | 0.15840 | 0.98350 | 0.33529 | 0.10907 |
| 64 | LOC_Os08g10560 | Os08g0206500 | 2.21400 | 0.15407 | 0.98350 | 0.33529 | 0.10739 |
| 65 | LOC_Os08g12800 | Os08g0224500 | 2.21400 | 0.15407 | 0.98350 | 0.33529 | 0.10739 |
| 66 | LOC_Os08g13870 | Os08g0236400 | 2.21400 | 0.15407 | 0.98350 | 0.33529 | 0.10739 |
| 67 | LOC_Os03g63110 | Os03g0848400 | 1.47500 | 0.24022 | 0.98350 | 0.46294 | 0.07666 |
| 68 | LOC_Os02g42412 | Os02g0636400 | 1.47300 | 0.24058 | 0.98350 | 0.46294 | 0.07575 |
| 69 | LOC_Os02g44730 | Os02g0667500 | 1.47300 | 0.24058 | 0.98350 | 0.46294 | 0.07564 |
| 70 | LOC_Os02g45160 | Os02g0673100 | 1.47300 | 0.24058 | 0.98350 | 0.46294 | 0.07564 |

|     |                |              |         |         |         |         |         |
|-----|----------------|--------------|---------|---------|---------|---------|---------|
| 71  | LOC_Os02g45980 | Os02g0684900 | 1.47300 | 0.24058 | 0.98350 | 0.46294 | 0.07564 |
| 72  | LOC_Os02g48210 | Os02g0712700 | 1.49400 | 0.23730 | 0.98350 | 0.46294 | 0.07564 |
| 73  | LOC_Os08g42930 | Os08g0542200 | 1.20300 | 0.28720 | 0.98350 | 0.54439 | 0.06264 |
| 74  | LOC_Os11g13650 | N/A          | 1.04300 | 0.32068 | 0.98350 | 0.59891 | 0.06264 |
| 75  | LOC_Os02g58540 | Os02g0832150 | 0.92900 | 0.34792 | 0.98350 | 0.63123 | 0.05477 |
| 76  | LOC_Os01g13300 | Os01g0234100 | 0.92900 | 0.34792 | 0.98350 | 0.63123 | 0.04907 |
| 77  | LOC_Os04g56250 | Os04g0657600 | 0.89800 | 0.35586 | 0.98350 | 0.63654 | 0.04907 |
| 78  | LOC_Os08g35310 | Os08g0454500 | 0.85100 | 0.36855 | 0.98350 | 0.64118 | 0.04752 |
| 79  | LOC_Os02g39590 | Os02g0608801 | 0.85100 | 0.36855 | 0.98350 | 0.64118 | 0.04513 |
| 80  | LOC_Os02g51900 | Os02g0755500 | 0.75300 | 0.39685 | 0.98350 | 0.68108 | 0.04513 |
| 81  | LOC_Os02g52060 | Os02g0757400 | 0.61500 | 0.44303 | 0.98350 | 0.70947 | 0.04513 |
| 82  | LOC_Os02g02650 | Os02g0118700 | 0.53600 | 0.47334 | 0.98350 | 0.70947 | 0.04017 |
| 83  | LOC_Os02g43460 | Os02g0650800 | 0.53600 | 0.47334 | 0.98350 | 0.70947 | 0.03305 |
| 84  | LOC_Os02g53970 | Os02g0780200 | 0.53600 | 0.47334 | 0.98350 | 0.70947 | 0.02894 |
| 85  | LOC_Os02g54330 | N/A          | 0.53600 | 0.47334 | 0.98350 | 0.70947 | 0.02894 |
| 86  | LOC_Os02g54500 | Os02g0786000 | 0.53300 | 0.47484 | 0.98350 | 0.70947 | 0.02894 |
| 87  | LOC_Os02g55180 | Os02g0795000 | 0.53300 | 0.47484 | 0.98350 | 0.70947 | 0.02894 |
| 88  | LOC_Os04g57670 | Os04g0672700 | 0.53300 | 0.47484 | 0.98350 | 0.70947 | 0.02875 |
| 89  | LOC_Os04g58720 | Os04g0683800 | 0.53300 | 0.47484 | 0.98350 | 0.70947 | 0.02875 |
| 90  | LOC_Os04g58820 | Os04g0685000 | 0.53300 | 0.47484 | 0.98350 | 0.70947 | 0.02875 |
| 91  | LOC_Os04g58910 | Os04g0685900 | 0.53300 | 0.47484 | 0.98350 | 0.70947 | 0.02875 |
| 92  | LOC_Os04g59060 | Os04g0687300 | 0.50800 | 0.48531 | 0.98350 | 0.71668 | 0.02875 |
| 93  | LOC_Os04g59540 | Os04g0691900 | 0.43300 | 0.51884 | 0.98350 | 0.74688 | 0.02875 |
| 94  | LOC_Os05g50660 | Os05g0583500 | 0.42400 | 0.52340 | 0.98350 | 0.74688 | 0.02875 |
| 95  | LOC_Os09g26300 | Os09g0432900 | 0.42400 | 0.52340 | 0.98350 | 0.74688 | 0.02743 |
| 96  | LOC_Os04g05030 | Os04g0136900 | 0.34300 | 0.56525 | 0.98350 | 0.74778 | 0.02349 |
| 97  | LOC_Os05g37040 | Os05g0442100 | 0.34300 | 0.56525 | 0.98350 | 0.74778 | 0.02299 |
| 98  | LOC_Os05g39760 | N/A          | 0.35600 | 0.55839 | 0.98350 | 0.74778 | 0.02299 |
| 99  | LOC_Os08g36320 | Os08g0465800 | 0.36200 | 0.55499 | 0.98350 | 0.74778 | 0.02063 |
| 100 | LOC_Os08g36760 | Os08g0471800 | 0.37900 | 0.54578 | 0.98350 | 0.74778 | 0.02063 |
| 101 | LOC_Os09g27570 | Os09g0448100 | 0.37900 | 0.54578 | 0.98350 | 0.74778 | 0.02063 |
| 102 | LOC_Os06g44820 | Os06g0658600 | 0.37900 | 0.54578 | 0.98350 | 0.74778 | 0.01971 |
| 103 | LOC_Os02g49986 | Os02g0732600 | 0.13700 | 0.71588 | 0.98350 | 0.85611 | 0.01937 |
| 104 | LOC_Os02g09820 | Os02g0191500 | 0.13700 | 0.71588 | 0.98350 | 0.85611 | 0.01871 |
| 105 | LOC_Os02g10120 | Os02g0194700 | 0.13700 | 0.71588 | 0.98350 | 0.85611 | 0.01871 |
| 106 | LOC_Os02g56380 | Os02g0807900 | 0.12700 | 0.72610 | 0.98350 | 0.85611 | 0.00789 |
| 107 | LOC_Os02g56480 | Os02g0809100 | 0.14300 | 0.70964 | 0.98350 | 0.85611 | 0.00789 |
| 108 | LOC_Os02g57960 | Os02g0826000 | 0.14300 | 0.70964 | 0.98350 | 0.85611 | 0.00789 |
| 109 | LOC_Os06g35850 | Os06g0551800 | 0.14300 | 0.70964 | 0.98350 | 0.85611 | 0.00789 |

|     |                |              |         |         |         |         |         |
|-----|----------------|--------------|---------|---------|---------|---------|---------|
| 110 | LOC_Os06g37500 | Os06g0572300 | 0.14300 | 0.70964 | 0.98350 | 0.85611 | 0.00789 |
| 111 | LOC_Os01g52330 | Os01g0721300 | 0.11200 | 0.74152 | 0.98350 | 0.85611 | 0.00754 |
| 112 | LOC_Os01g52880 | Os01g0729400 | 0.11200 | 0.74152 | 0.98350 | 0.85611 | 0.00754 |
| 113 | LOC_Os01g53420 | Os01g0735900 | 0.11200 | 0.74152 | 0.98350 | 0.85611 | 0.00754 |
| 114 | LOC_Os09g25620 | Os09g0424300 | 0.14300 | 0.70964 | 0.98350 | 0.85611 | 0.00731 |
| 115 | LOC_Os09g25890 | Os09g0427800 | 0.14300 | 0.70964 | 0.98350 | 0.85611 | 0.00731 |
| 116 | LOC_Os02g10900 | Os02g0203500 | 0.13900 | 0.71698 | 0.98350 | 0.85611 | 0.00699 |
| 117 | LOC_Os05g40790 | Os05g0486300 | 0.13200 | 0.72010 | 0.98350 | 0.85611 | 0.00620 |
| 118 | LOC_Os05g41130 | Os05g0490300 | 0.13200 | 0.72010 | 0.98350 | 0.85611 | 0.00620 |
| 119 | LOC_Os05g41290 | Os05g0492200 | 0.13200 | 0.72010 | 0.98350 | 0.85611 | 0.00620 |
| 120 | LOC_Os11g19700 | Os11g0302500 | 0.04200 | 0.83928 | 0.98350 | 0.89571 | 0.00263 |
| 121 | LOC_Os11g24060 | Os11g0427700 | 0.04200 | 0.83928 | 0.98350 | 0.89571 | 0.00263 |
| 122 | LOC_Os11g24180 | Os11g0430000 | 0.04200 | 0.83928 | 0.98350 | 0.89571 | 0.00263 |
| 123 | LOC_Os11g24770 | N/A          | 0.04200 | 0.83928 | 0.98350 | 0.89571 | 0.00263 |
| 124 | LOC_Os11g28950 | Os11g0479100 | 0.04700 | 0.83001 | 0.98350 | 0.89571 | 0.00263 |
| 125 | LOC_Os03g53220 | Os03g0743800 | 0.04700 | 0.83001 | 0.98350 | 0.89571 | 0.00235 |
| 126 | LOC_Os03g56400 | Os03g0775400 | 0.04700 | 0.83001 | 0.98350 | 0.89571 | 0.00235 |
| 127 | LOC_Os03g57160 | Os03g0785300 | 0.04700 | 0.83001 | 0.98350 | 0.89571 | 0.00235 |
| 128 | LOC_Os03g58390 | Os03g0798200 | 0.04700 | 0.83001 | 0.98350 | 0.89571 | 0.00235 |
| 129 | LOC_Os04g55760 | Os04g0651500 | 0.03100 | 0.86218 | 0.98350 | 0.91248 | 0.00172 |
| 130 | LOC_Os02g11820 | Os02g0208900 | 0.00000 | 0.98350 | 0.98350 | 0.98350 | 0.00007 |
| 131 | LOC_Os01g54350 | Os01g0747400 | 0.00000 | 0.98350 | 0.98350 | 0.98350 | 0.00002 |
| 132 | LOC_Os01g54515 | Os01g0748950 | 0.00000 | 0.98350 | 0.98350 | 0.98350 | 0.00002 |
| 133 | LOC_Os01g55050 | Os01g0754500 | 0.00000 | 0.98350 | 0.98350 | 0.98350 | 0.00002 |
| 134 | LOC_Os01g56040 | Os01g0765900 | 0.00000 | 0.98350 | 0.98350 | 0.98350 | 0.00002 |
| 135 | LOC_Os01g57230 | Os01g0780600 | 0.00000 | 0.98350 | 0.98350 | 0.98350 | 0.00002 |
| 136 | LOC_Os01g57900 | Os01g0788900 | 0.00100 | 0.97305 | 0.98350 | 0.98350 | 0.00002 |

810

811

812 **Table 5** OsWAK SNP Primer Sets and PCR conditions. Primer name with FS and RS suffix  
813 were used for amplifying the SNP region and Sanger sequencing. The primer names with  
814 suffix FG were used for direct SNP-specific PCR-based genotyping.  
815

| <b>Primer</b>                          | <b>Sequence</b>                  | <b>Length (nt)</b> | <b>Temperature Degree C</b> | <b>%GC</b> |
|----------------------------------------|----------------------------------|--------------------|-----------------------------|------------|
| For PCR and Sanger sequencing          |                                  |                    |                             |            |
| Forward-FS                             | CAGGTCAAGGAAGAGGGAGG             | 20                 | 59                          | 60         |
| Reverse-RS                             | AGGAGACATGATTCTCCCTGG            | 20                 | 58                          | 50         |
| For PCR amplification-based genotyping |                                  |                    |                             |            |
| Forward-FG1                            | GAACACTTTCGAGTGTCATCTC<br>CACCAA | 28                 | 62                          | 46         |
| Forward-FG2                            | ACACTTTCGAGTGTCATCTCCA<br>CC CG  | 26                 | 64                          | 54         |

816

817

818

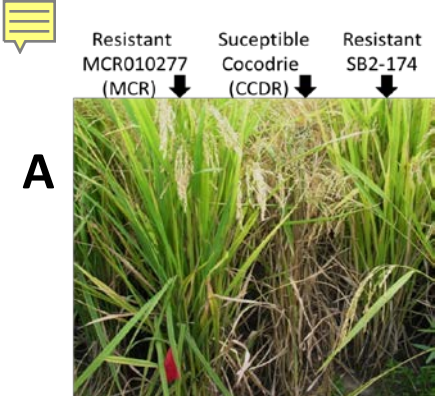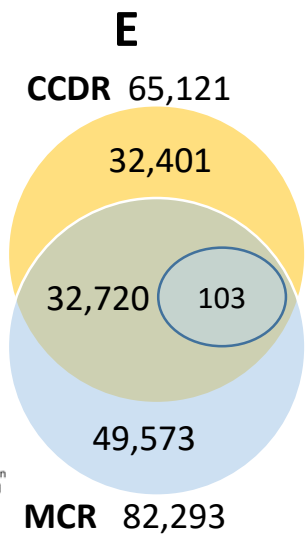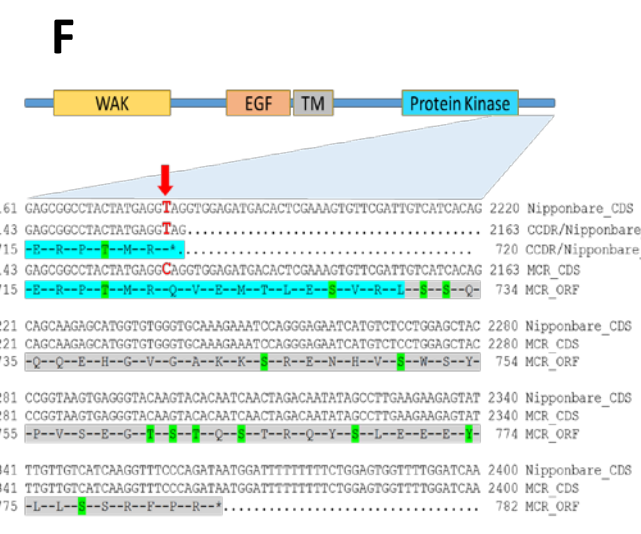

**G**

| Genetic Diversity               |        |                      |
|---------------------------------|--------|----------------------|
| Rice line                       | Allele | Phenotype            |
| Nipponbare (japonica reference) | T      | Susceptible          |
| CL153                           | T      | Susceptible          |
| Cypress                         | T      | Susceptible          |
| Blue Bonnet                     | T      | Susceptible          |
| CL111                           | T      | Susceptible          |
| 93-11 (indica reference)        | C      | Moderate Susceptible |
| Nonabokra                       | C      | Resistant            |
| Pokkali                         | C      | Resistant            |
| Jasmine                         | C      | Resistant            |
| TeQing                          | C      | Resistant            |
| IR64                            | C      | Resistant            |
| IR29                            | C      | Resistant            |
| Nagina 22 (N22)                 | C      | Resistant            |
| Kasalath (AUS reference)        | C      | Resistant            |
| <i>O. nivara</i>                | C      | Resistant            |
| <i>O. rufipogon</i>             | C      | Resistant            |
| <i>O. barthii</i>               | C      | Resistant            |
| <i>O. brachyantha</i>           | C      | N/A                  |
| <i>O. glaberrima</i>            | C      | N/A                  |
| <i>O. glumaepatula</i>          | C      | Resistant            |
| <i>O. longistaminata</i>        | C      | Resistant            |
| <i>O. meridionalis</i>          | C      | Resistant            |
| <i>O. punctata</i>              | C      | N/A                  |
| <i>Leersia perrieri</i>         | C      | N/A                  |

**H**

| Population    |        |             |       |
|---------------|--------|-------------|-------|
| Individual    | Allele | Phenotype   | Score |
| CCDR (Parent) | T      | Susceptible | 7.5   |
| SB2-99        | C      | Susceptible | 7.5   |
| SB2-13        | T      | Susceptible | 7.5   |
| SB2-48        | T      | Susceptible | 8     |
| SB2-88        | T      | Susceptible | 8     |
| SB2-126       | T      | Susceptible | 8     |
| SB2-144       | T      | Susceptible | 8     |
| SB2-203       | T      | Susceptible | 7.5   |
| SB2-255       | T      | Susceptible | 8     |
| SB2-276       | T      | Susceptible | 8     |
| SB2-314       | T      | Susceptible | 7.5   |
| MCR (Parent)  | C      | Resistant   | 3.5   |
| SB2-03        | C      | Resistant   | 4.7   |
| SB2-109       | C      | Resistant   | 5.5   |
| SB2-134       | C      | Resistant   | 5.5   |
| SB2-158       | C      | Resistant   | 5     |
| SB2-161       | C      | Resistant   | 5.7   |
| SB2-174       | C      | Resistant   | 4.5   |
| SB2-259       | C      | Resistant   | 5.7   |
| SB2-206       | C      | Resistant   | 6     |
| SB2-225       | C      | Resistant   | 6     |
| SB2-272       | C      | Resistant   | 6     |

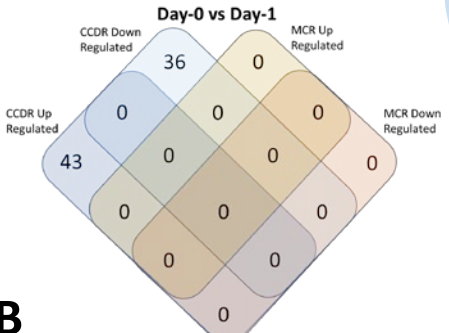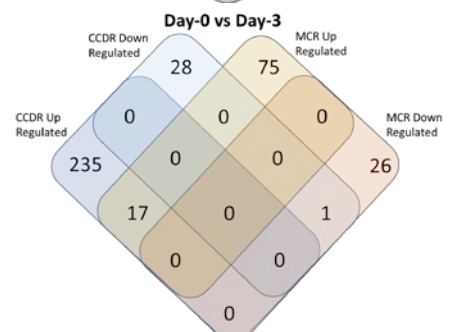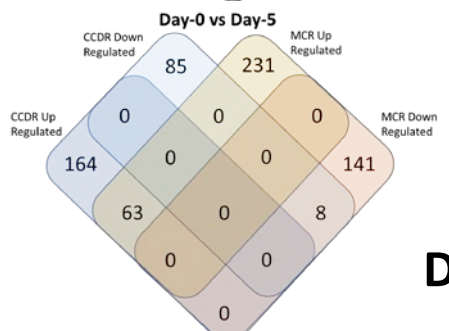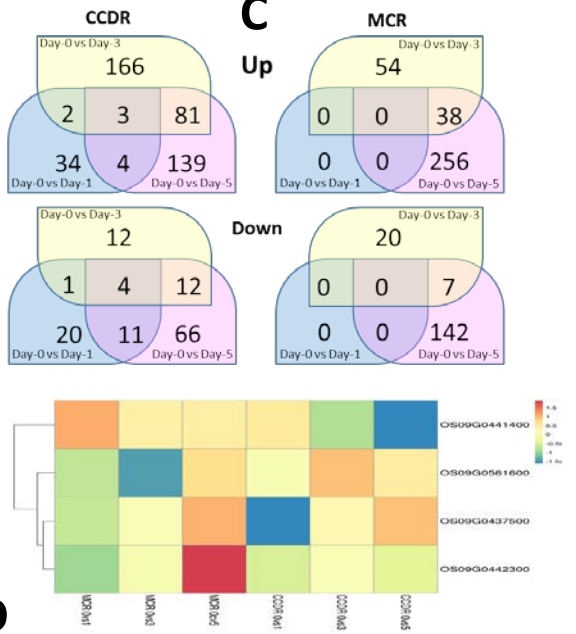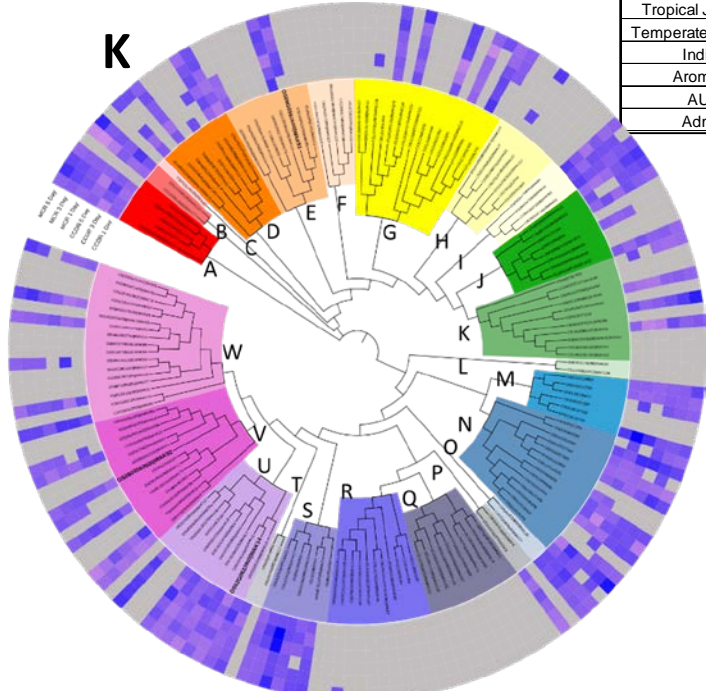

**J**

| 3K Rice genome project |        |      |     |
|------------------------|--------|------|-----|
| Type                   | Allele |      |     |
|                        | T      | C    | T/C |
| Tropical Japonica      | 471    | 5    | 0   |
| Temperate Japonica     | 360    | 0    | 3   |
| Indica                 | 18     | 1742 | 22  |
| Aromatic               | 68     | 4    | 1   |
| AUS                    | 55     | 145  | 1   |
| Admix                  | 35     | 38   | 25  |

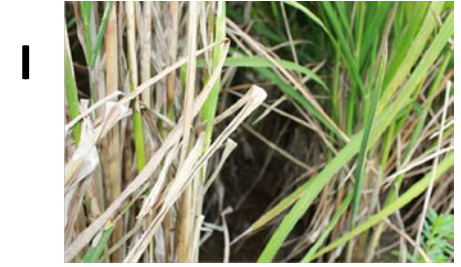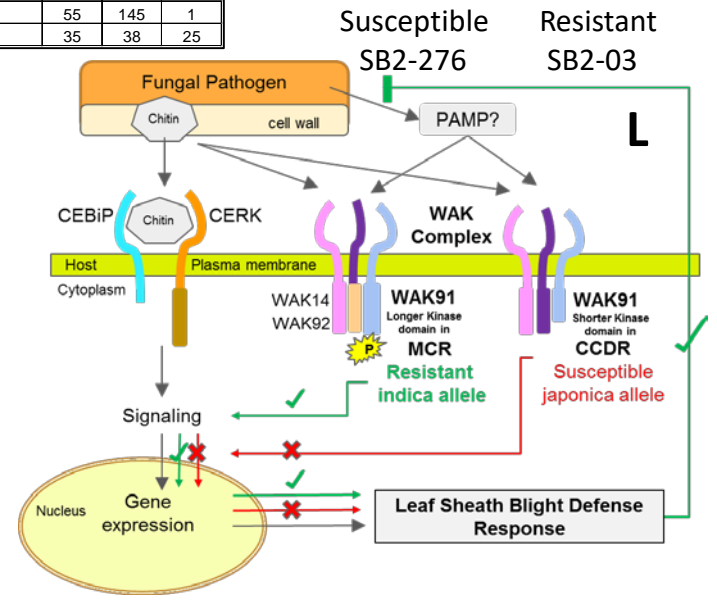

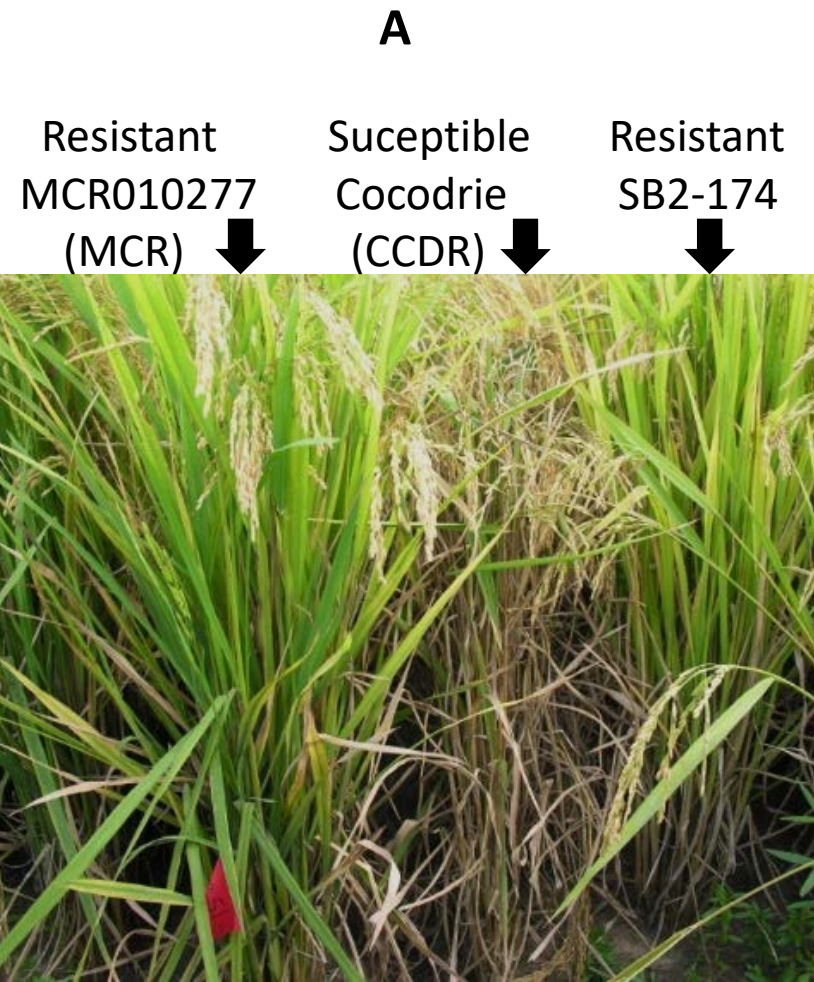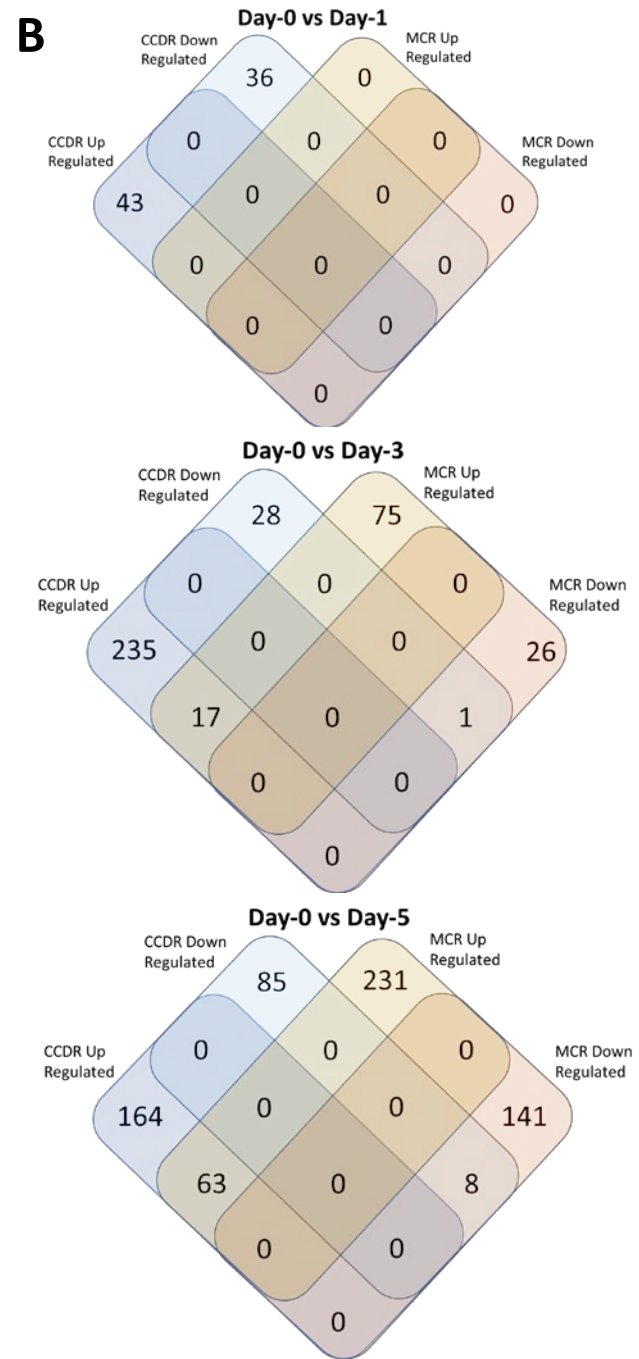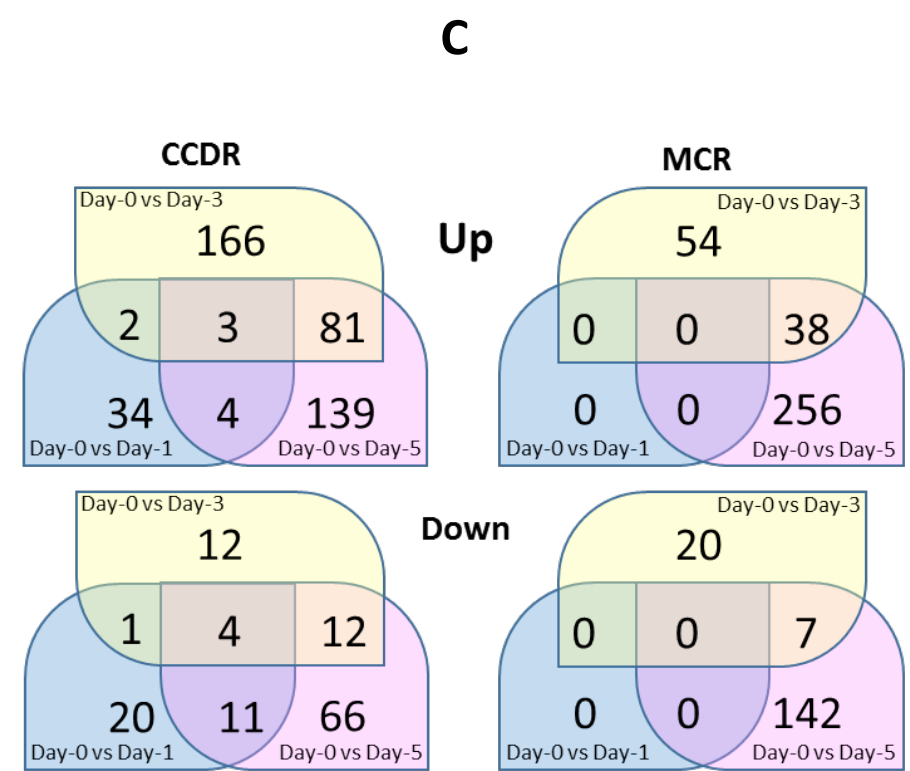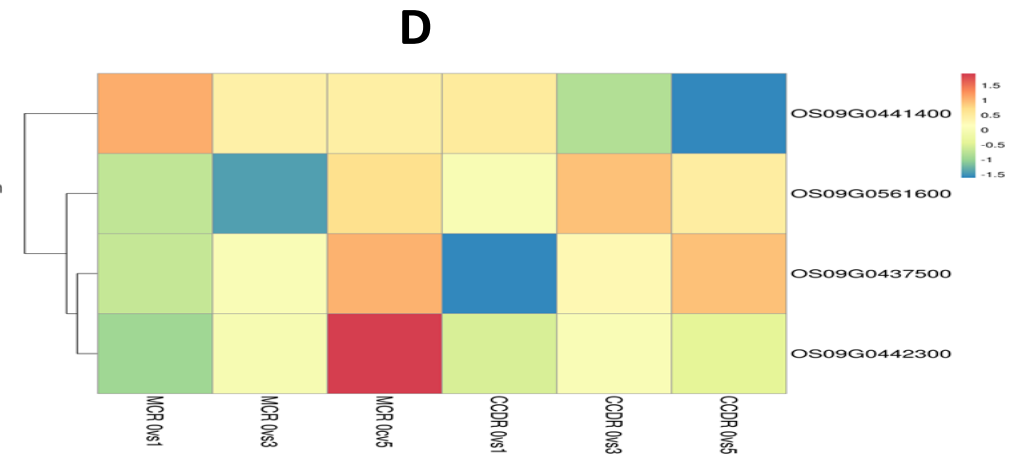

**E**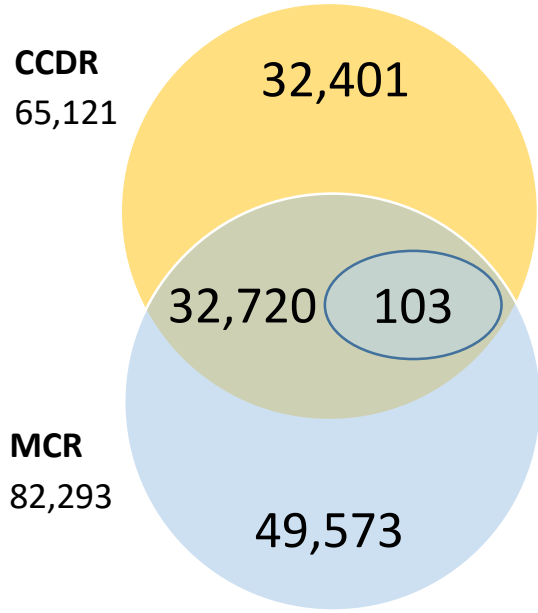**F**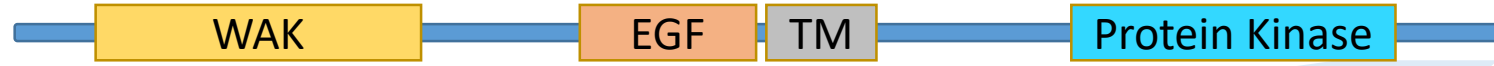

2161 GAGCGGCCTACTATGAGG**T**AGGTGGAGATGACACTCGAAAGTGTTTCGATTGTCATCACAG 2220 Nipponbare\_CDS  
 2143 GAGCGGCCTACTATGAGG**T**AG..... 2163 CCDR/Nipponbare\_CDS  
 715 **-E--R--P--T--M--R--\***..... 720 CCDR/Nipponbare\_ORF

2143 GAGCGGCCTACTATGAGG**C**AGGTGGAGATGACACTCGAAAGTGTTTCGATTGTCATCACAG 2163 MCR\_CDS  
 715 **-E--R--P--T--M--R--Q--V--E--M--T--L--E--S--V--R--L--S--S--Q--** 734 MCR\_ORF

2221 CAGCAAGAGCATGGTGTGGGTGCAAAGAAATCCAGGGAGAATCATGTCTCCTGGAGCTAC 2280 Nipponbare\_CDS  
 2221 CAGCAAGAGCATGGTGTGGGTGCAAAGAAATCCAGGGAGAATCATGTCTCCTGGAGCTAC 2280 MCR\_CDS  
 735 **-Q--Q--E--H--G--V--G--A--K--K--S--R--E--N--H--V--S--W--S--Y--** 754 MCR\_ORF

2281 CCGGTAAGTGAGGGTACAAGTACACAATCAACTAGACAATATAGCCTTGAAGAAGAGTAT 2340 Nipponbare\_CDS  
 2281 CCGGTAAGTGAGGGTACAAGTACACAATCAACTAGACAATATAGCCTTGAAGAAGAGTAT 2340 MCR\_CDS  
 755 **-P--V--S--E--G--T--S--T--Q--S--T--R--Q--Y--S--L--E--E--E--Y--** 774 MCR\_ORF

2341 TTGTTGTCATCAAGGTTTCCAGATAATGGATTTTTTTTTTCTGGAGTGGTTTTGGATCAA 2400 Nipponbare\_CDS  
 2341 TTGTTGTCATCAAGGTTTCCAGATAATGGATTTTTTTTTTCTGGAGTGGTTTTGGATCAA 2400 MCR\_CDS  
 775 **-L--L--S--S--R--F--P--R--\***..... 782 MCR\_ORF

G

| Genetic Diversity               |        |                      |
|---------------------------------|--------|----------------------|
| Rice line                       | Allele | Phenotype            |
| Nipponbare (japonica reference) | T      | Susceptible          |
| CL153                           | T      | Susceptible          |
| Cypress                         | T      | Susceptible          |
| Blue Bonnet                     | T      | Susceptible          |
| CL111                           | T      | Susceptible          |
| 93-11 (indica reference)        | C      | Moderate Susceptible |
| Nonabokra                       | C      | Resistant            |
| Pokkali                         | C      | Resistant            |
| Jasmine                         | C      | Resistant            |
| TeQing                          | C      | Resistant            |
| IR64                            | C      | Resistant            |
| IR29                            | C      | Resistant            |
| Nagina 22 (N22)                 | C      | Resistant            |
| Kasalath (AUS reference)        | C      | Resistant            |
| <i>O. nivara</i>                | C      | Resistant            |
| <i>O. rufipogon</i>             | C      | Resistant            |
| <i>O. barthii</i>               | C      | Resistant            |
| <i>O. brachyantha</i>           | C      | N/A                  |
| <i>O. glaberrima</i>            | C      | N/A                  |
| <i>O. glumaepatula</i>          | C      | Resistant            |
| <i>O. longistaminata</i>        | C      | Resistant            |
| <i>O. meridionalis</i>          | C      | Resistant            |
| <i>O. punctata</i>              | C      | N/A                  |
| <i>Leersia perrieri</i>         | C      | N/A                  |

H

| Population           |        |             |            |
|----------------------|--------|-------------|------------|
| Individual           | Allele | Phenotype   | Score      |
| <b>CCDR (Parent)</b> | T      | Susceptible | 7.5        |
| SB2-99               | C      | Susceptible | 7.5        |
| SB2-13               | T      | Susceptible | 7.5        |
| SB2-48               | T      | Susceptible | 8          |
| SB2-88               | T      | Susceptible | 8          |
| SB2-126              | T      | Susceptible | 8          |
| SB2-144              | T      | Susceptible | 8          |
| SB2-203              | T      | Susceptible | 7.5        |
| SB2-255              | T      | Susceptible | 8          |
| SB2-276              | T      | Susceptible | 8          |
| SB2-314              | T      | Susceptible | 7.5        |
| <b>MCR (Parent)</b>  | C      | Resistant   | <b>3.5</b> |
| SB2-03               | C      | Resistant   | 4.7        |
| SB2-109              | C      | Resistant   | 5.5        |
| SB2-134              | C      | Resistant   | 5.5        |
| SB2-158              | C      | Resistant   | 5          |
| SB2-161              | C      | Resistant   | 5.7        |
| SB2-174              | C      | Resistant   | 4.5        |
| SB2-259              | C      | Resistant   | 5.7        |
| SB2-206              | C      | Resistant   | 6          |
| SB2-225              | C      | Resistant   | 6          |
| SB2-272              | C      | Resistant   | 6          |

I

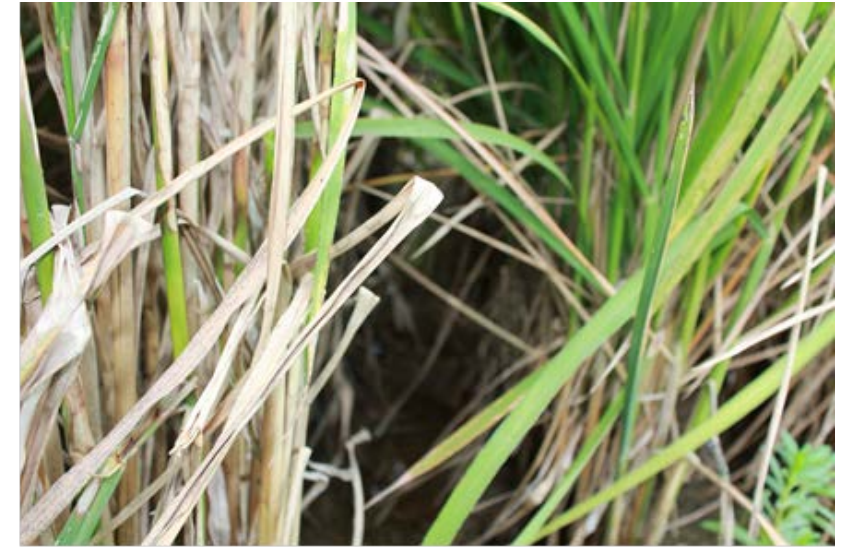

Susceptible  
SB2-276

Resistant  
SB2-03

J

| 3K Rice genome project |        |      |     |
|------------------------|--------|------|-----|
| Type                   | Allele |      |     |
|                        | T      | C    | T/C |
| Tropical Japonica      | 471    | 5    | 0   |
| Temperate Japonica     | 360    | 0    | 3   |
| Indica                 | 18     | 1742 | 22  |
| Aromatic               | 68     | 4    | 1   |
| AUS                    | 55     | 145  | 1   |
| Admix                  | 35     | 38   | 25  |



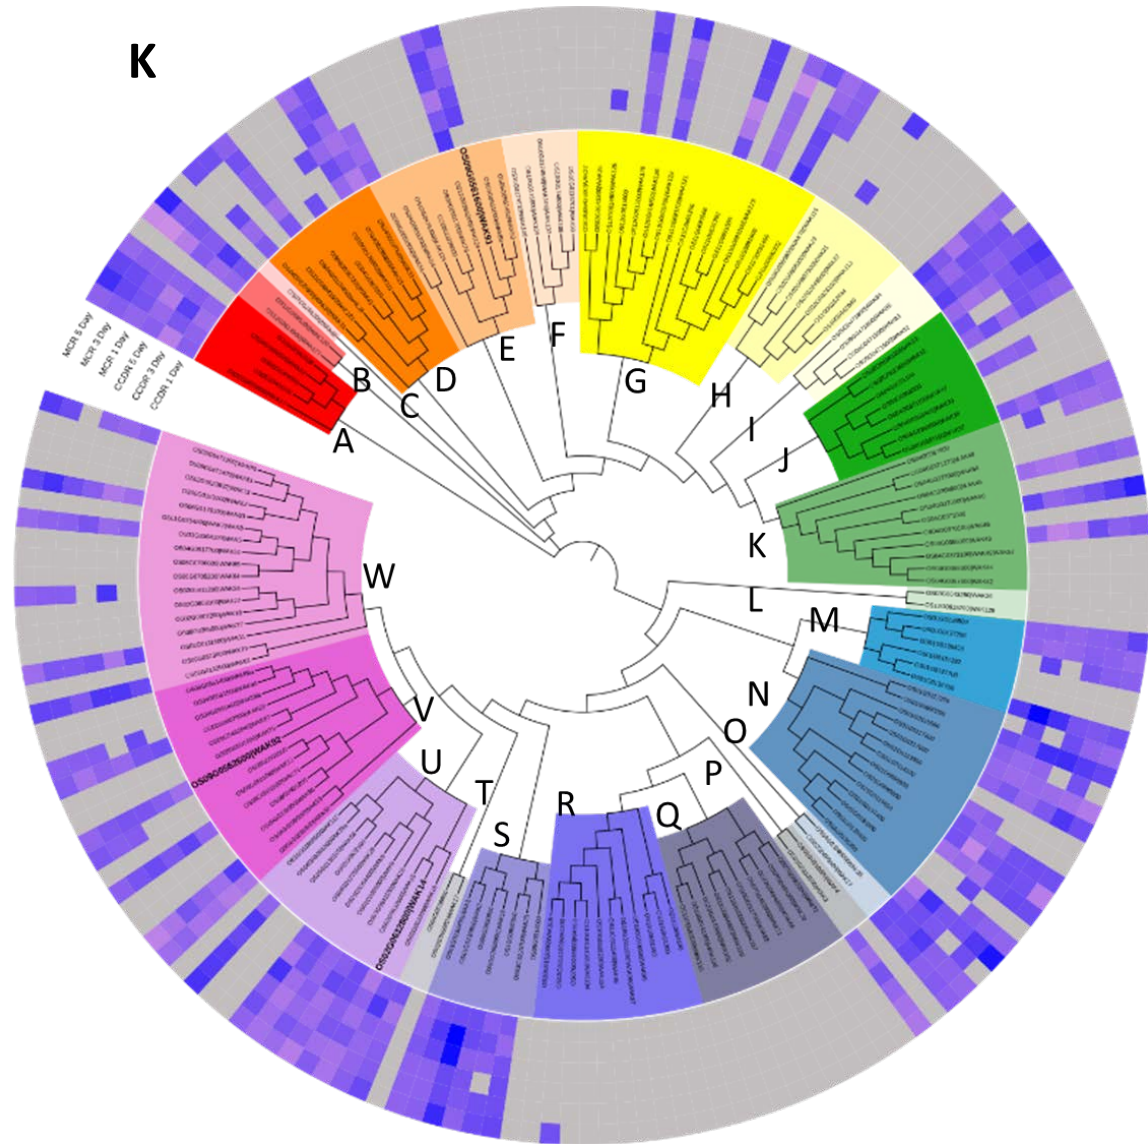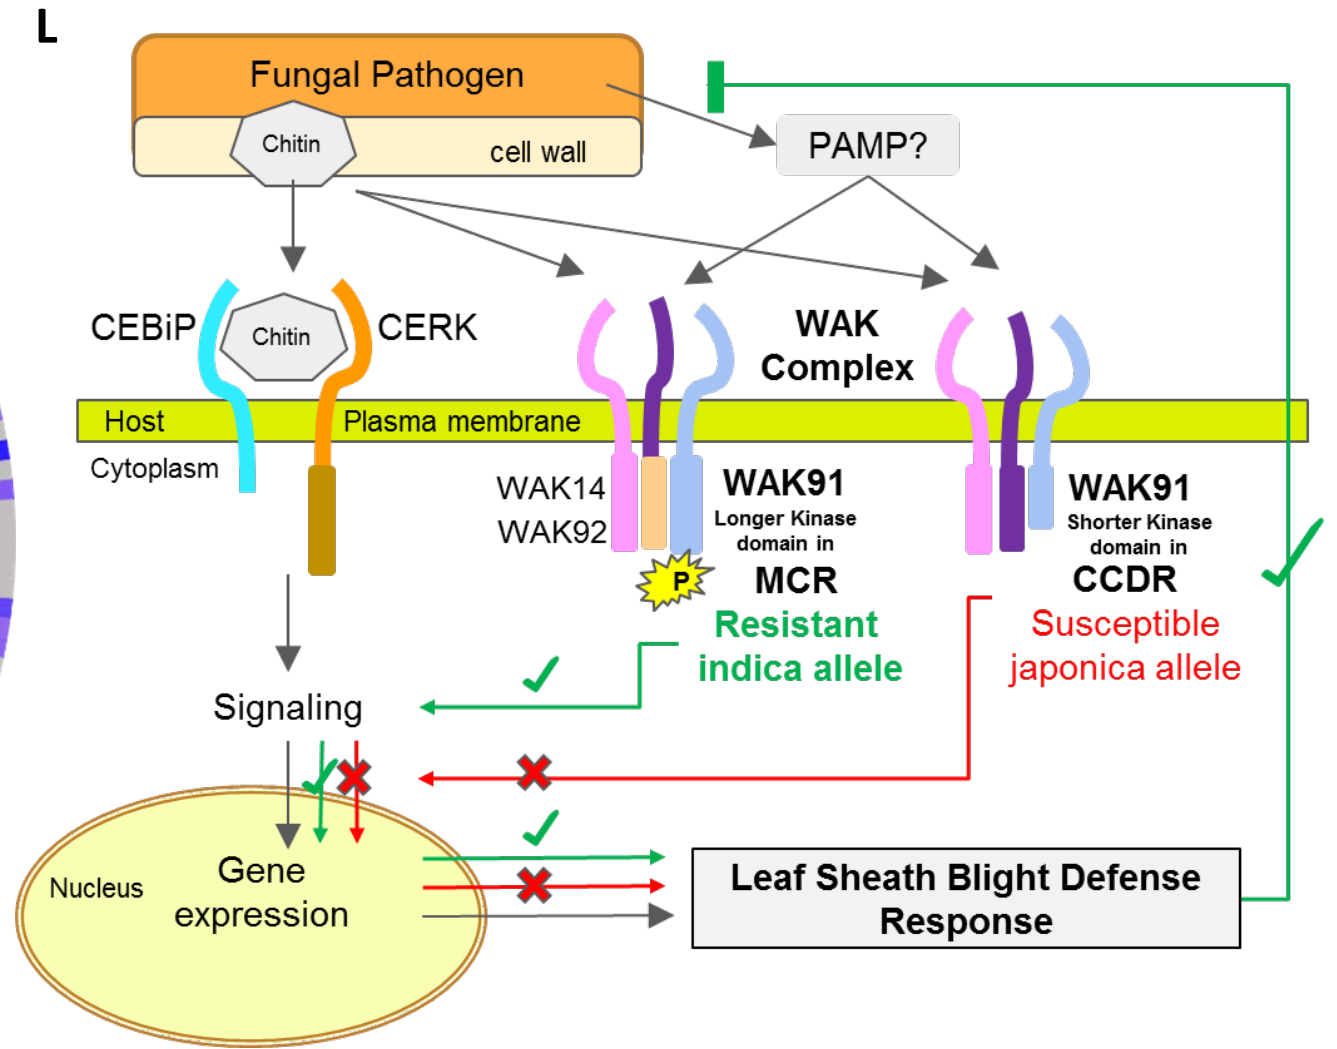

Source: https://www.biorxiv.org/content/10.1101/625509v1.full.pdf
